# Supplementary material for: Plant functional types and traits as biodiversity indicators for tropical forests: two biogeographically separated case studies including birds, mammals and termites
Source: Springer Nature journal article supplement (doi:10.1007/s10531-013-0517-1), 2013-07-11
Supplement: MOESM1 [file 5387938]

**Plant functional types and traits as biodiversity indicators for tropical forests: two biogeographically separated case studies including birds, mammals and termites.**

For *Biodiversity and Conservation*

**Online Resources**

Authors and contacts

Andrew N. Gillison\*, David E. Bignell\*, Kenneth R.W. Brewer, Erick C.M. Fernandes, David T. Jones, Douglas Sheil, Peter H. May, Allan D.Watt, Reginaldo Constantino, Eduardo G. Couto, Kurniatun Hairiah, Paul Jepson, Agus P. Kartono, Ibnu Maryanto, Germano G. Neto, Meine van Noordwijk, Elton A. Silveira, Francis-Xavier Susilo, Stephen A. Vosti

\* Corresponding authors

Prof David Bignell, School of Biological and Chemical Sciences, Queen Mary University of London, Mile End Road, London, UK E1 4NS

Dr Andy Gillison, Center for Biodiversity Management, P.O. Box 120, Yungaburra 4884 Queensland, Australia

Email: [d.bignell@qmul.ac.uk](mailto:d.bignell@qmul.ac.uk)  
[andygillison@gmail.com](mailto:andygillison@gmail.com)

## Appendix S1 Methods

**Study areas.** A DOMAIN map (Fig. S1) is used to provide a broadscale (0.5 degree grid) visual display of similarities and differences between the two ecoregions surveyed in this study. The map provides a climate-based, geographic range of other forested ecoregions with similar climate values where output from this study has potential application. For this study additional climate data were obtained from the Federal University of Mato Grosso, Cuiabá Brazil (Nunes 2003) and the Meteorological and Geophysical Agency, Indonesia (BMG: Badan Meteorologi dan Geofisika) [http://www.bmkg.go.id/BMKG\\_Pusat/Depan.bmkg](http://www.bmkg.go.id/BMKG_Pusat/Depan.bmkg) (accessed 3 February 2013)

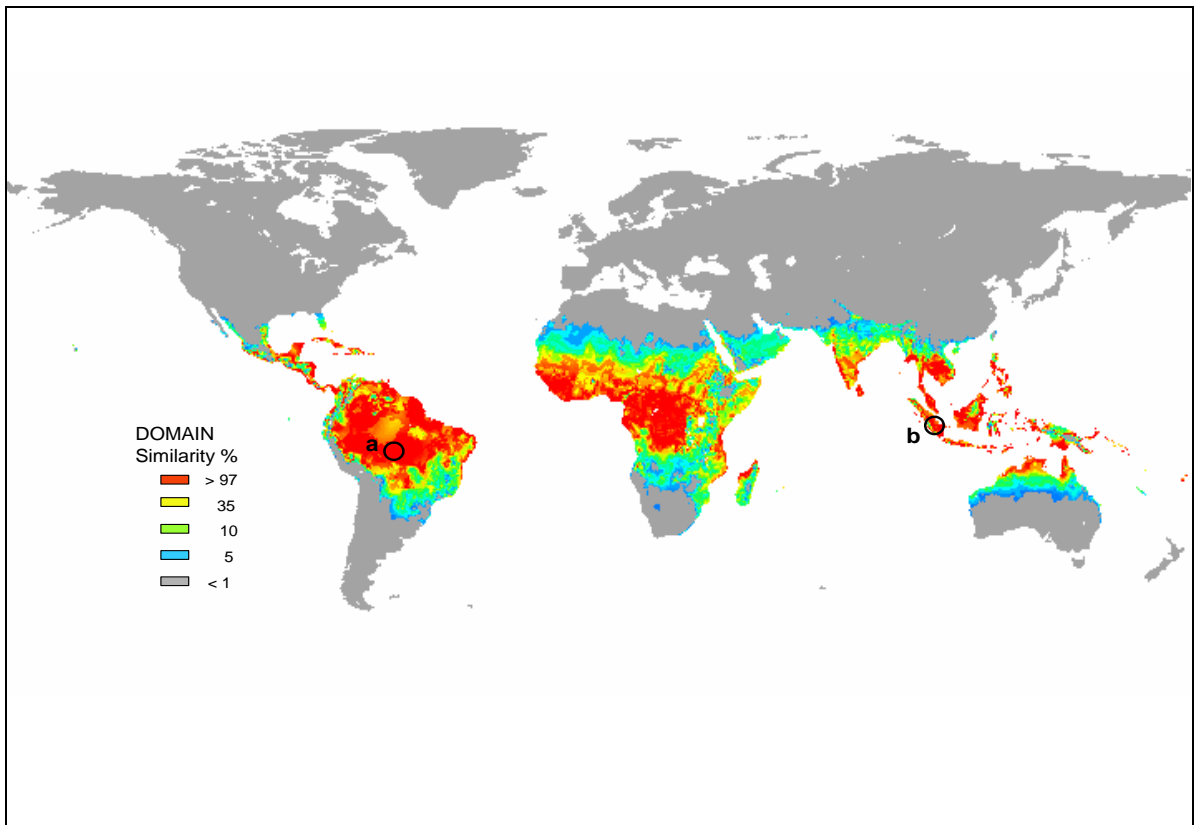

**Figure S1.** Ecoregional baseline locations in (a) Mato Grosso, Brazil and (b) Sumatra, Indonesia. DOMAIN map illustrates representative coverage of global environmental domains based on elevation, minimum temperature of the coldest month, mean annual precipitation and total annual actual evapotranspiration (data at 0.5 deg. grid) Ecoregional baseline sites (a,b,) occur within Domains with > 97% similarity. The Brazilian Amazon basin contains about 40% of the world's remaining tropical rain forest and the entire basin is considered to be the richest source of terrestrial biodiversity (Fearnside 2005). Indonesia contains almost 10% of the world's remaining humid tropical forests, much of it formerly on lowland Sumatra that, as with Mato Grosso, is under extreme threat from deforestation and land use intensification (Critical Ecosystem Partnership Fund 2001)

**Gradsects.** Gradsect survey design is now well established internationally (Grossman et al. 1998; Wessels et al. 1998; USGS-NPS 2003; FAO 2005). Where the central aim is to maximise information about the distribution of biota, it is a proven low-input, high-return alternative to traditionally high-input, low-return surveys based on random sampling. As the sampling approach is gradient- rather than area-based it is not subject to sample bias associated with the comparison of widely differing area sizes (e.g. Brazil vs Sumatra). Because gradsects avoid the need for standard survey methods based primarily on random or systematic (e.g. grid-based) design, they greatly reduce logistic demands while improving outcomes for spatial modelling of taxa under known or assumed environmental determinants. Where quantitative estimates of numbers of items (e.g. species) per unit area are required, then standard survey designs incorporating random sampling should be used. In our case, by sampling gradients of environmental variables considered to be important ecoregional determinants of both species and PFTs, we aimed to capture spatially referenced information that could be used to detect correlations between environment and biota and help identify appropriate biodiversity indicators. Once acquired, such information can be used directly in extrapolating and testing actual and potential spatial distributional patterns of biota under different management scenarios.

**Vegetation.** Software for the VegClass protocol used in this study is available via the public domain at [www.cbmglobe.org](http://www.cbmglobe.org) and [www.cifor.org](http://www.cifor.org).

**Invertebrate fauna.** We selected termites because of their acknowledged role as ‘soil ecosystem engineers’ conditioning soil, and because they are both readily observable and taxonomically tractable, as well as being a key invertebrate group already known to respond sensitively along perceived land use intensity gradients (Constantino 1992; Martius 1994; Bignell et al. 1997; Lavelle et al. 1997; Jones et al. 2003). Our analysis indicates that the termite faunas of both continents are amenable to comparison although the sampling methods were not quite the same in both. However, our goal is not to compare the termite faunas of Brazil and Sumatra, but to demonstrate cross-correlations with other elements of the biota. Phylogenetic differences at the family level are small between the two regions. While fungus growers (Macrotermitinae) do not occur in Brazil they represent only 5 out of 53 species in Table S11 and are a subfamily. Transect-based methods are designed to identify functional groups, which are distributed as follows (proportion of species):

| <i>Group</i>   | <i>Brazil</i> | <i>Sumatra</i> |
|----------------|---------------|----------------|
| wood-feeding   | 29%           | 49%            |
| soil-feeding   | 40%           | 40%            |
| intermediate   | 22%           | 9%             |
| litter-feeding | 9%            | -              |
| epiphyte       | -             | 2%             |

The proportion of soil-feeders is the same, and this is usually the most sensitive group in terms of response to habitat disturbance. In terms of families, the proportions are:

| <i>Family</i>   | <i>Brazil</i> | <i>Sumatra</i> |
|-----------------|---------------|----------------|
| Kalotermitidae  | -             | 2%             |
| Rhinotermitinae | 6%            | 15%            |
| Termitidae      | 94%           | 83%            |

In Sumatra, termites were extracted from plant litter, mounds, above-ground runways and soil monoliths along a 100x2m line intercept centred on a vegetation transect, following an established protocol (Jones et al. 2002). In Mato Grosso, termites were sampled intensively mainly aboveground by two people for two hours inside the same transects used for vegetation (40x5m). In both Brazil and Sumatra we found high correlations between different termite feeding groups, plant-based biodiversity features and specific soil properties.

**Soil.** Although soil and vegetation samples were co-located for all sites in each region actual methods of soil sampling differed in several minor respects. In Brazil we sampled the 0-10 cm surface horizon by compositing three collections taken from the center and both ends of each transect. In Sumatra we sampled both 0-5 and 5-10 cm depths (consolidated from 8 sample points within each transect). For the purposes of this study we took the mean of analytical results from the combined Sumatran 0-5 and 5-10 cm data. In Brazil soil sampling in extreme environments on exposed granitic and sandstone pavements restricted samples to < 5 cm. While only the surface 0-10 cm data were used in the analysis in the present study, correlative analyses with soil data from deeper samples generally reflected those from the upper horizon (not reported here). Variation in laboratory procedures in each region meant that several elemental analyses (B, Fe, Mn, S, Zn) were completed in Brazil but not Sumatra, while total N and soil bulk density were measured only in Sumatra. A standard method of field survey was conducted in Brazil (EMBRAPA 1997) in which the methods for most soil analyses are specified to a set laboratory protocol (Soil Survey Division Staff 1993). In Sumatra, laboratory analyses were conducted at Brawijaya University, broadly following Anderson and Ingram (1993) and Hairiah and van Noordwijk (2000) Soil samples for the 0-5, 5-10, 10-20, 20-30 cm depth zone below the litter layer were passed through a 2 mm sieve and air-dried for analysis of texture (% sand, silt, clay), pH (1N KCl), pH(H<sub>2</sub>O), P Bray<sub>II</sub>, C<sub>org</sub> (Walkey and Black), N<sub>tot</sub> (Kjeldahl), exchangeable K, Ca, Mg, Na, Al and H, and effective cation exchange capacity (ECEC) by summation. Soil bulk density was measured for the 0-5 cm top soil layer (8 replicates per sampling point), by inserting a 165 cm<sup>3</sup> ring from the mineral soil surface, just below the litter layer.

**Total and aboveground carbon (Sumatra).** Methods for quantifying carbon stocks were used as specified in the Alternatives to Slash and Burn protocol (Palm et al., 1994). All tree diameters above 5 cm in the forest transects were converted into aboveground biomass with an allometric equation modified from (Brown 1997) on the basis of additional data collected in the Jambi area (Ketterings et al. 2001):

$$Y \text{ (kg tree}^{-1}\text{)} = 0.092 \text{ Diam}^{2.60}$$

where tree diameter is measured in cm.

Understorey and herb layer vegetation was measured in eight 0.25 m<sup>2</sup> quadrat samples (or four 1-m<sup>2</sup> samples for non-forest plots); total fresh weight was measured and subsamples were collected for determining dry matter content. Diameter and length of dead wood (> 5 cm diameter) were measured within the 40x5m transect and converted to volume on the basis of a cylindrical form; three apparent density classes were used and ring samples were taken to assess the dry weight bulk density (g cm<sup>-3</sup>) of the partly decayed wood. Surface litter (including wood < 5 cm diameter) was collected down to

the surface of the mineral soil in eight 0.25 m<sup>2</sup> samples. To remove mineral soil particles, the litter samples were washed and sundried; subsamples were taken for dry matter content.

- Anderson JM, Ingram, JSI (eds) (1993) Tropical soil biology and fertility: a handbook of methods, 2<sup>nd</sup> edn. CAB International, Wallingford
- Bignell DE, Eggleton P, Nunes L, Thomas KL (1997) Termites as mediators of carbon fluxes in tropical forest: budgets for carbon dioxide and methane emissions. In: Watt AD, Stork NE, Hunter MD (eds) Forests and insects, Chapman and Hall, London, pp 109-134
- Brown S (1997) Estimating biomass change of tropical forest: a primer. FAO Forestry Paper 134. FAO, Rome
- Critical Ecosystem Partnership Fund (2001) Sumatra forest ecosystems of the Sundaland biodiversity hotspot. <http://www.cepf.net> (accessed 3 February 2013)
- Constantino R (1992). Abundance and diversity of termites (Isoptera) in two sites of primary rain forest in Brazilian Amazonia. *Biotropica* 24:420-430
- EMBRAPA (1997) Manual de métodos de análise de solo. 2a edição ed. NPS/EMBRAPA, Rio de Janeiro
- FAO (2005) Food and Agriculture Organization of the United Nations, Statistical Databases. [WWW Document]. URL (<http://apps.fao.org/page/form?collection=Production.Crops.Primary&Domain=Production&servlet=1&language=EN&hostname=apps.fao.org&version=default>) (accessed April 2005)
- Fearnside PM (2005) Deforestation in Brazilian Amazonia: history, rates and consequences. *Conserv Biol* 19:680-688
- Grossman DH, Faber-Langendoen D, Weakley AS, Anderson M, Bourgeron P, Crawford R, Goodin K, Landaal S, Metzler K, Patterson K, Pyne M, Reid M, Sneddon L (1998) International classification of ecological communities: Terrestrial vegetation of the United States. Volume I: The national vegetation classification system: development, status, and applications. The Nature Conservancy, Arlington, Virginia, USA
- Hairiah K, van Noordwijk M (2000) In: Above-ground Biodiversity assessment Working Group Summary Report 1996-99 Impact of different land uses on biodiversity. (ed Gillison AN). Alternatives to Slash and Burn project. ICRAF, Nairobi, Kenya, pp. 143-154
- Jones DT, Susilo FX, Bignell DE, Hardiwinoto S, Gillison AN, Eggleton P (2003) Termite assemblage collapse along a land-use intensification gradient in lowland central Sumatra, Indonesia. *J Appl Ecol* 40:380-391
- Ketterings QM, Coe R, Van Noordwijk M, Ambagu Y, Palm CA (2001) Reducing uncertainty in the use of allometric biomass equations for predicting above-ground tree biomass in mixed secondary forests. *Forest Ecol Manag* 146:199-209
- Lavelle P, Bignell DE, Lepage M (1997) Soil function in a changing world: the role of ecosystem engineers. *Eur J Soil Biol* 33:159-193
- Martius C (1994) Diversity and ecology of termites in Amazonian forests. *Pedobiologia* 38:407-428
- Nunes PC (2003) Influência do efluxo de CO<sub>2</sub> do solo na produção de forragem numa pastagem extensiva e num sistema agrosilvipastoril. Cuiabá, Mestrado em Agricultura Tropical. Universidade Federal de Mato Grosso, Cuiabá, Brazil
- Palm C, Hairiah K, van Noordwijk M (1994) Methods for sampling above and belowground organic pools for ASB sites. In: D.M. Murdiyarso, K. Hairiah and M.

- Van Noordwijk (Eds) Modelling and measuring soil organic matter dynamics and greenhouse gas emissions after forest conversion. Proceedings of Workshop/ Training Course 8-15. August 1994, Bogor/Muara Tebo. ASB-Indonesia publication No. 1. pp 57-71
- Soil Survey Division Staff (1993) Soil survey manual. USDA Handbook No. 18. U.S. Government Print Office, Washington DC
- USGS-NPS, United States Geological Survey – National Parks Service (2003) Vegetation mapping program 5.0. Field methods
- Wessels KJ, Van Jaarsveld AS, Grimbeek JD, Van der Linde MJ (1998) An evaluation of the gradsect biological survey method. *Biodivers Conserv* 7:1093-1121

## Appendix S2

### Further discussion

**Biodiversity and soils.** The high correlation between vegetation and soil chemical elements raises questions about cause and effect especially with respect to soil chemistry. For this reason, we focus on fixed soil structural features that are largely independent of plants and other biota. In the Brazilian study correlations between soil texture and PFT diversity and certain of their functional elements indicate a plant adaptive response to gradients of soil texture. Other studies in the Peruvian Amazon basin (Tuomisto et al. 2003) indicate soils determine vegetation type, rather than the dispersal by diaspores. In both regions, we found chamaephytic (shrub-like) life-forms to be closely associated with soil texture (% sand, silt, clay) indicating a possible adaptive response to seasonal water availability.

**Application to tropical forest environments.** The similarity patterns in the DOMAIN map (Fig. S1, Appendix S1 above ) are based on a range of key climate attributes and suggest that the results from this study are at least broadly applicable to forested landscapes areas with > 95% similarity in the climatic domain envelope. Other scale-related climate factors as well as variation in soil substrate, hydrology and land use history all play a potential role in determining the relevance of the indicators identified in this study. The level of spatial resolution of ground data and the availability of adequate computerised potential distribution mapping procedures and geographic information systems are also key factors in determining the extent to which such indicators can be successfully extrapolated for both science and management-related purposes. Experience in the Congo basin (Kotto-Same et al. 2000), India (Gillison 2004) and Thailand (Gillison and Liswanti 1999) using the same vegetation-based rapid survey methodology suggests that the core bioindicators identified in the present paper can be applied to these and probably most lowland tropical forests.

Gillison AN (2004) Biodiversity Assessment in the North Bank Landscape, North East India. WWF-India, New Delhi

Gillison, A.N. & Liswanti, N. (1999) Biodiversity and productivity assessment for sustainable agroforest ecosystems. Mae Chaem, Northern Thailand: Preliminary Report. Alternatives to Slash and Burn project, International Centre for Research in Agroforestry, Nairobi, Kenya

Kotto-Same J, Moukam A, Njomgang R, Tiki-Manga T, Tonye J, Diaw C, Gockowski J, Houser S, Weise S, Nwaga D, Zapfack L, Palm C, Woomer P, Gillison AN, Bignell D, Tondoh J (2000) Summary report and synthesis of Phase II in Cameroon. ICRAF, Nairobi, Kenya

Tuomisto H, Ruokolainen K, Yli-Halla M (2003) Dispersal, environment and floristic variation of western Amazonian forests. *Science* 299: 241-244

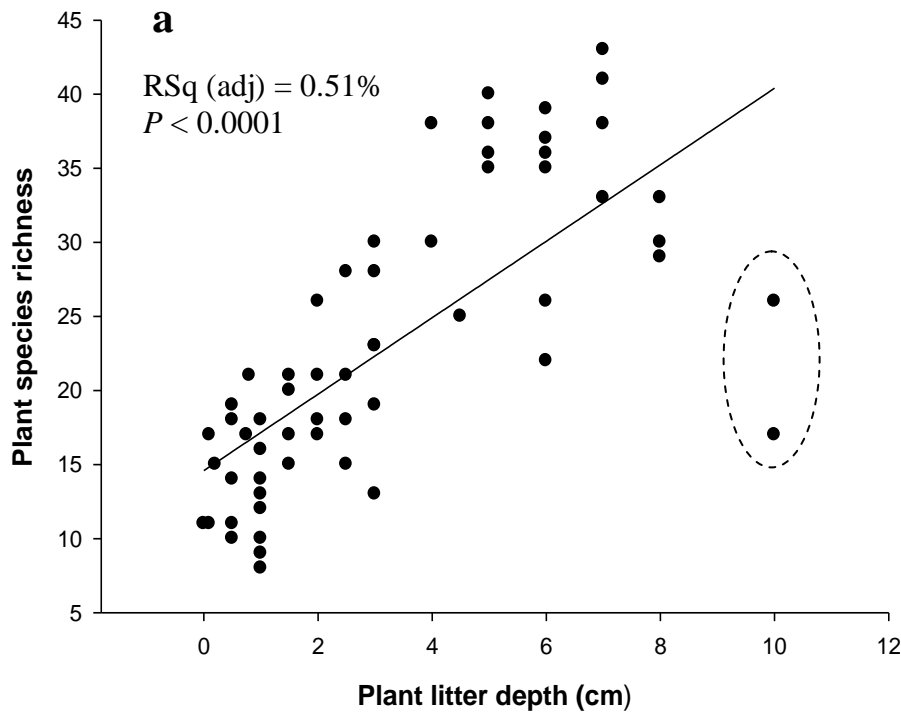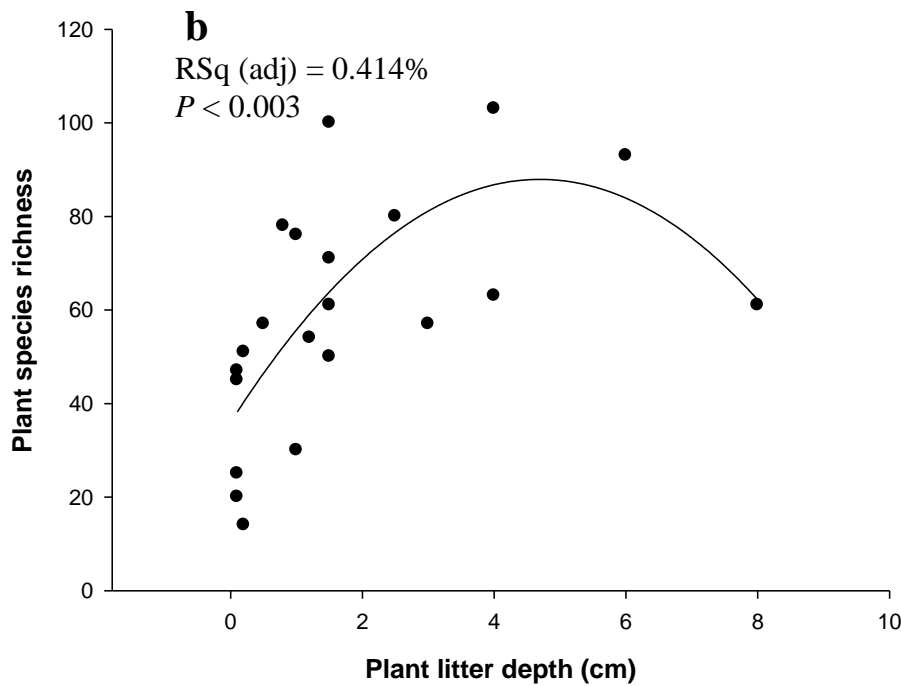

**Fig. S2** Litter and species relationship along tropical forested landscape gradients. Points are 40x5m transects. **(a)** North Queensland, Australia. Two outlying transects enclosed in dotted line are wet sclerophyll forests dominated by *Eucalyptus* spp. If these are removed then RSq = 0.69%. **(b)** Cameroon, Central West Africa, Congo basin. Both areas include gradsects ranging from fired savanna woodlands through transitional forest to closed humid forest. In fired areas data were collected at a minimum of six months following fire allowing rebuilding of the litter base



## Appendix S3

### Data analysis

**Multidimensional scaling.** Attempts to identify bioindicators using alternative analyses approaches may prove valuable. Our own initial efforts with multidimensional scaling suggest that the added complexity compromises the ease of ecological interpretation. But these and other multivariate approaches require further examination.

**Correlation and regression analyses.** We calculated Pearson product-moment correlation using Minitab (v.14.2) software. In the tables presented in this study, correlations were sorted according to most significant *P* values and then *r* values. For linear regression, we used simple Ordinary Least Squares (OLS) as this appeared consistent with our goal of finding simple indicators to use in the field. Since in general, OLS regression is relatively robust against non-normality (except in the presence of extreme outliers; Lumley et al. 2002), no test was considered necessary to detect non-normality in the residuals. In situations involving ecological outliers such as vegetation on upland sandstone pavements in Brazil, these sites were removed to facilitate comparative analysis (Table S16, Appendix S4 below). In certain cases where the residuals were clearly heteroskedastic, and the line of best fit was required to pass through the origin, OLS regression was relinquished in favour of weighted regression through the origin and the Satterthwaite approximation (Satterthwaite 1946).

Thus, for Fig. 2, we assumed heteroskedasticity and compared the regression slopes using the Satterthwaite approximation as follows: the OLS plot of species diversity against PFT diversity for the Brazil survey indicated a straight line relationship. The intercept on the species axis was insignificant, indicating the relationship can pass through the origin. By contrast, the comparable Sumatra OLS plot had a negative intercept on the species axis. Since negative values for species are unrealistic, we still adjusted the regression to pass through the origin. To test whether the Brazil and Sumatra slopes have significantly different variances, the means of ratios were compared using the Satterthwaite approximation to the regular t-test. Using Satterthwaite's approximation we calculate  $t^2$  as as that fraction which has the numerator  $\{(\text{Sumatra mean of ratios}) - (\text{Brazil mean of ratios})\}^2$  or  $\{(1.9481 - 1.4006)\}^2$  and the denominator  $(w_1 + w_2)$  where in our case,

$$w_1 = \{(s_1)^2\}/n_1 = 0.48630/16 = 0.030394 \text{ and}$$

$$w_2 = \{(s_2)^2\}/n_2 = 0.05350/32 = 0.001672.$$

$$\text{Thus } t^2 = \{(1.9481 - 1.4006)\}^2 / (0.030394 + 0.001672) = 0.5475^2 / 0.032066$$

$$\text{and } t = 0.5475 / \{(0.032066)^{0.5}\}$$

$$= 0.5475 / 0.1791$$

$$= 3.057.$$

For the degrees of freedom (df), Satterthwaite uses

$$\text{df} = (w_1 + w_2)^2 / [\{(w_1)^2\}/(n_1 - 1) + \{(w_2)^2\}/(n_2 - 1)]$$

$$= (0.030394 + 0.001672)^2 / [\{(0.030394^2)/15\} + \{(0.001672^2)/31\}]$$

$$= (0.032066^2) / (0.000061586 + 0.000000090)$$

$$= 0.0010282 / 0.000061676$$

$$= 16.67.$$

The critical values for 16 and 17 degrees of freedom and (two-tailed)  $P \leq 0.01$  are 2.921 and 2.898 respectively, thus the difference between the regions is significant at the 1 per cent level.

**t Tests.** We conducted two-tailed t tests for small sample sizes ( $n < 10$ ) for all correlated pairs of dependent variables where  $P \leq 0.05$ . These tests were restricted to termites (Tables S13, S14, S16, below) and confirmed that the sample sizes in each case were statistically acceptable. The results of these tests are not reported here.

**Iterative modelling and other indicator assessment methods.** To be consistent with our initial aim, that the final choice of indicators should be driven by practical as well as scientific criteria, we eliminated multiple and polynomial regressions as well as multi-dimensional-scaling and a suite of ecological diversity indices including a measure of plant functional complexity (PFC) (Gillison 2002) although initial investigations showed many were highly significant. Iterative modelling approaches for predicting species distribution (and related biodiversity indicators) can generate theoretically desirable outcomes but often frequently fail in practice, whereas predictive, information-theoretic models that take into account existing knowledge about species and ecosystem behaviour may be closer to reality (Rushton et al. 2004).

**Addressing false discovery rates.** It is common practice to regard estimated regression coefficients (the slopes of the lines of best fit) as significant if their  $P$ -statistics fall in the range  $P < 0.05$ . However, falling in this range means only that if the true value of the coefficient is zero, an observed value equally or more extreme than the actual one will only be achieved less than five per cent of the time. It is usually more useful to ask, "Given the observation, what is the probability that the true value of the coefficient is either zero, or very close to zero?" The answer to this question is indicated by the False Discovery Rates (EFDRs) displayed in Table S23 (below). It is shown there that those observed slopes for which  $0.05 > P > 0.01$  actually have about a 30 per cent probability of being "rare events", occurring only by chance, and not indicative of any appreciable departure from zero. Observed slopes with  $0.01 > P = 0.001$  and  $0.001 > P = 0.0001$ , however, are predominantly in the "real difference" category and those with  $P < 0.0001$  overwhelmingly so.

Sorić's original definition of a False Discovery Rate (FDR), or as we describe it here, an EFDR, has been used in preference to later versions for several reasons (Sorić 1989). First, it is substantially simpler to describe and to understand. Secondly, it is easier to apply to specified ranges of  $P$ -values. Thirdly, a previous objection by Benjamini and Hoffberg (1995), that it is "a mixture of expectations and realizations" remains unsettled. Finally, the "False Nondiscoveries" mentioned by Sankar (2006), are by definition undetectable, and even if they could be detected they would still tend to be small and in our context thus likely to be unimportant. Moreover, to take them into account would reduce the reported FDR. In our view it is preferable to desist from claiming a few genuine but marginal discoveries, and thereby to avoid attributing additional false discoveries as real.

Tables S21 and S22 (below) display both the  $P$ -values and other regression slopes. S21 relates to significantly positive observations, and S22 to significantly negative observations. Table S23 (below) displays the numbers of those observations, positive and negative separately, in each of the twenty 5% segments of  $P$ -values. S21 and S22 indicate that the transition from significant to insignificant observations occurs relatively suddenly

when the relevant False Discovery Rate (FDR) is close to 0.05, which value was suggested by Fisher (1925) as being a sensible choice for defining “significance”. In S23, the most relevant figures in that table are the following:

1. The numbers of positive and negative regression slopes in the supposedly “significant” range, namely  $0.05 > P > 0.00$ , which numbers are 271 and 103 respectively; and
2. The numbers of undeniably significant positive and negative regression slopes in the range  $0.0025 > P > 0.00$ , which are 148 and 12 respectively.

If we now ask ourselves which of these two sets of observations is the more convincingly significant, there is an unambiguous answer. When the  $P$ -value is 0.00256 (to five decimal places), or roughly  $1/390$ , the relevant ratio of significant to insignificant is a mere 19 to one. Consequently there is no way that any of the 271 positives and 103 negatives in the range  $0.05 > P > 0.0025$  can be convincingly regarded as “significant”. Our favoured alternative is therefore that of defining “significance” to mean “roughly in the range  $0.0025 > P > 0.00$ ”

Benjamini Y, Hoffberg Y (1995) Controlling the false discovery rate: a practical and powerful approach to multiple testing. *J Roy Statist Soc B* 57:289-300

Fisher RA (1925) *Statistical methods for research workers*. Oliver and Boyd, Edinburgh

Gillison AN (2002) A generic, computer-assisted method for rapid vegetation classification and survey: tropical and temperate case studies. *Conserv Ecol*, 6, 3 [WWW document]. URL <http://www.consecol.org/vol6/iss2/art3> (accessed 3 February 2013)

Lumley T, Diehr P, Merson S, Chen L (2002) The importance of the normality assumption in large public health datasets. *Annu Rev Publ Health* 23:151-169

Rushton SP, Ormerod SJ, Kerby G (2004) New paradigms for modelling species distributions? *J Appl Ecol* 41:193-200

Satterthwaite FE (1946) An approximate distribution of estimates of variance components. *Biometrics Bull* 2:110-114

Soriç, B. Statistical "Discoveries" and effect size estimation (1989) *J Amer Statist Assoc* 84:608-610

Sankar SK (2006) False discovery and false nondiscovery rates in single-step multiple testing Procedures. *Ann Statist* 34:394-415

## Appendix S4

### Supplementary Tables

- Table S1.** Plant functional attributes and elements used to construct PFTs
- Table S2.** Site location, physical environment and land use type NW Mato Grosso
- Table S3.** Site location, physical environment and land use type Jambi, Sumatra, Indonesia
- Table S4.** Vegetation summary data for NW Mato Grosso
- Table S5.** Vegetation summary data for Jambi, Sumatra
- Table S6.** List of vascular plant species and PFTs collected in the Mato Grosso study area (sample page).
- Table S7.** List of vascular plant species and PFTs collected in the Jambi, Sumatra study area (sample page).
- Table S8.** Vertebrate fauna listed according to Class and transect in NW Mato Grosso
- Table S9.** Vertebrate (mammal) fauna listed according to family and transect in Jambi, Sumatra, Indonesia
- Table S10.** Vertebrate (bird) fauna listed according to family and transect in Jambi, Sumatra, Indonesia
- Table S11.** Invertebrate fauna (termites) in Mato Grosso listed according to feeding group and transect
- Table S12.** Invertebrate fauna (termites) recorded in Jambi, Sumatra according to taxa, feeding group and transect
- Table S13.** Target groups and significant indicators occurring in at least one region (excluding PFEs for fauna)
- Table S14.** Significant PFE indicators common to both regions
- Table S15.** Vegetation structure and soil properties
- Table S16.** Species and PFT diversity and soil correlates using combined regional data
- Table S17.** Soil analyses for Mato Grosso (0-10 cm depth only)
- Table S18.** Soil and carbon analyses for Jambi, Sumatra (averaged 0-10 depth only)
- Table S19.** Indicators of aboveground and total carbon - Sumatran baseline
- Table S20.** Data variables recorded for each 40x5 m transect (VegClass)
- Table S21.** Significant and close-to significant positive regression slopes
- Table S22.** Significant and close-to significant negative regression slopes
- Table S23.** Empirical false discovery rates from an analysis of 1307 regressions
-

**Table S1. Plant functional attributes and elements used to construct PFTs**

| Attribute                 | Element                         | Description                             |
|---------------------------|---------------------------------|-----------------------------------------|
| [Photosynthetic envelope] |                                 |                                         |
| Leaf size class           | nr                              | no repeating leaf units                 |
|                           | pi                              | picophyll < 2mm <sup>2</sup>            |
|                           | le                              | leptophyll 2 - 25                       |
|                           | na                              | nanophyll 25 - 225                      |
|                           | mi                              | microphyll 225 - 2025                   |
|                           | no                              | notophyll 2025 - 4500                   |
|                           | me                              | mesophyll 4500 - 18200                  |
|                           | pl                              | platyphyll 18200 - 36400                |
|                           | ma                              | macrophyll 36400 - 18 x 10 <sup>4</sup> |
|                           | mg                              | megaphyll > 18 x 10 <sup>4</sup>        |
| Leaf inclination          | ve                              | vertical >30° above horizontal          |
|                           | la                              | lateral ±30° to horizontal              |
|                           | pe                              | pendulous >30° below horizontal         |
| Chlorotype                | co                              | composite                               |
|                           | do                              | dorsiventral                            |
| Morphotype                | is                              | isobilateral or isocentric              |
|                           | de                              | deciduous                               |
|                           | ct                              | cortic (photosynthetic stem)            |
|                           | ac                              | achlorophyllous (without chlorophyll)   |
|                           | ro                              | rosulate or rosette                     |
|                           | so                              | solid 3-D                               |
|                           | su                              | succulent                               |
|                           | pv                              | parallel-veined                         |
|                           | fi                              | filicoid (fern) (Pteridophytes)         |
|                           | ca                              | carnivorous (e.g. <i>Nepenthes</i> )    |
|                           | [Supporting vascular structure] |                                         |
| Life form                 | ph                              | phanerophyte                            |
|                           | ch                              | chamaephyte                             |
|                           | hc                              | hemicryptophyte                         |
|                           | cr                              | cryptophyte                             |
|                           | th                              | therophyte                              |
|                           | li                              | liane                                   |
| Root type                 | ad                              | adventitious                            |
|                           | ae                              | aerating (e.g. pneumatophore)           |
|                           | ep                              | epiphytic                               |
|                           | hy                              | hydrophytic                             |
|                           | pa                              | parasitic                               |

PFTs are constructed from PFEs according to a rule-based grammar<sup>22</sup>. For example the PFT for an individual plant of *Brosimum guianensis* would be recorded as a combination of six PFEs **no-co-do-de-ct-ph** (i.e. with **no**tophyll-sized leaves, **co**mposite leaf inclination, **do**rsiventral leaf, **de**ciduous with green stem or photosynthetic subrhizome or cortex **ct** and a **ph**anerophytic life form (woody plant with perennating organs > 2m above ground)).

**Table S2. Site location, physical environment and land use type NW Mato Grosso**

| Site No. | MT code. | Fauna site | Location                 | Municipality. | Latitude deg.min.sec. | Longitude deg.min.sec. | Elev. (m) | Slope % | Aspect Deg. |
|----------|----------|------------|--------------------------|---------------|-----------------------|------------------------|-----------|---------|-------------|
| 1        | PN01     |            | Vale do Amenhecer L8     | Juruena       | 10-22-27 S            | 58-27-11 W             | 259       | 0       | 0           |
| 2        | PN05     | TF         | Manejo florestal, Rhoden | Juruena       | 10-32-55 S            | 58-30-30 W             | 230       | 0       | 0           |
| 3        | PN06     | TF         | Chapada Dardanelos       | Juruena       | 10-23-36 S            | 58-53-11 W             | 281       | 10      | 125         |
| 4        | PN07     | TF         | Chapada Dardanelos       | Juruena       | 10-23-40 S            | 58-53-03 W             | 285       | 1       | 210         |
| 5        | PN08     | TF         | Chapada Dardanelos       | Juruena       | 10-23-33 S            | 58-53-15 W             | 270       | 2       | 60          |
| 6        | PN09     | TF         | Manejo florestal, Rhoden | Juruena       | 10-28-10 S            | 58-34-55 W             | 232       | 0       | 0           |
| 7        | PN10     |            | Pastagem do Rizzieri     | Juruena       | 10-31-41 S            | 58-35-28 W             | 265       | 0       | 0           |
| 8        | PN11     | F          | Manejo florestal, Rhoden | Juruena       | 10-33-47 S            | 58-25-55 W             | 239       | 0       | 0           |
| 9        | PN12     |            | Linha Parana             | Cotriguaçu    | 09-57-55 S            | 58-31-00 W             | 266       | 0       | 0           |
| 10       | PN14     |            | Fazenda Imburana         | Castanheira   | 10-55-21 S            | 58-24-57 W             | 260       | 10      | 98          |
| 11       | PN15     |            | Fazenda Imburana         | Castanheira   | 10-55-21 S            | 58-24-52 W             | 263       | 5       | 280         |
| 12       | PN16     | F          | Vale do Amenhecer L8     | Juruena       | 10-26-13 S            | 58-27-10 W             | 265       | 0       | 0           |
| 13       | PN17     | F          | Vale do Amenhecer L8     | Juruena       | 10-27-08 S            | 58-27-05 W             | 265       | 0       | 0           |
| 14       | PN18     |            | Vale do Amenhecer L8     | Juruena       | 10-26-08 S            | 58-27-02 W             | 265       | 0       | 0           |
| 15       | PN19     | F          | Vale do Amenhecer L8     | Juruena       | 10-26-10 S            | 58-27-01 W             | 263       | 0       | 0           |
| 16       | PN20     | F          | Vale do Amenhecer L8     | Juruena       | 10-26-09 S            | 58-26-54 W             | 266       | 0       | 0           |
| 17       | PN21     |            | Alcalinas Canamá         | Juruena       | 10-04-52 S            | 58-47-49 W             | 225       | 40      | 255         |
| 18       | PN22     | TF         | Pronatura Res. Stn. Bxa. | Juruena       | 10-21-26 S            | 58-27-49 W             | 260       | 25      | 275         |
| 19       | PN23     | TF         | Km 3 Estrada             | Juruena       | 10-21-34 S            | 58-29-25 W             | 241       | 0       | 0           |
| 20       | PN24     | F          | Alcalinas Canamá         | Juruena       | 10-04-06 S            | 58-46-00 W             | 180       | 0       | 0           |
| 21       | PN25     | T          | S. Reserva indígena      | Cotriguaçu    | 09-46-29 S            | 58-40-40 W             | 285       | 5       | 90          |
| 22       | PN26     | TF         | Fazenda São Nicolao      | Cotriguaçu    | 09-51-33 S            | 58-17-16 W             | 242       | 5       | 275         |
| 23       | PN27     | TF         | Fazenda São Nicolao      | Cotriguaçu    | 09-51-38 S            | 58-13-38 W             | 237       | 3       | 5           |
| 24       | PN28     | F          | Fazenda São Nicolao      | Cotriguaçu    | 09-51-26 S            | 58-14-27 W             | 247       | 5       | 180         |
| 25       | PN29     |            | Vale do Amenhecer L2     | Juruena       | 10-22-20 S            | 58-27-06 W             | 268       | 0       | 0           |
| 26       | PN30     | T          | Research Stn Pronatura   | Juruena       | 10-21-04 S            | 58-27-15 W             | 253       | 7       | 210         |
| 27       | PN31     |            | Fazenda Coroado          | Castanheira   | 10-55-06 S            | 58-21-22 W             | 208       | 0       | 0           |
| 28       | PN32     |            | Fazenda Coroado          | Castanheira   | 10-55-11 S            | 58-22-34 W             | 241       | 10      | 61          |
| 29       | PN33     |            | Vale do Seringal         | Castanheira   | 10-43-03 S            | 58-33-34 W             | 242       | 0       | 0           |
| 30       | PN34     |            | Vale do Seringal         | Castanheira   | 10-44-48 S            | 58-34-16 W             | 264       | 6       | 99          |
| 31       | PN35     |            | Fazenda Cruzeiro do Sul  | Castanheira   | 10-51-22 S            | 58-38-59 W             | 295       | 45      | 148         |
| 32       | PN36     |            | Fazenda Cruzeiro do Sul  | Castanheira   | 10-51-21 S            | 58-39-59 W             | 300       | 15      | 55          |

(Continued next page)

**Table S2. Site location, physical environment and land use type NW Mato Grosso (continued)**

| Site No. | MT code. | Parent rock     | Soil Type      | Soil Funct. type | Land-<br>scape type | Land Use Type (LUT)                     |
|----------|----------|-----------------|----------------|------------------|---------------------|-----------------------------------------|
| 1        | PN01     | Granite, sedim. | Ultisol        | 2                | III                 | Primary forest, logged                  |
| 2        | PN05     | Granite, sedim. | Ultisol        | 2                | III                 | Primary forest, logged                  |
| 3        | PN06     | Granite, coarse | Entisol        | 1                | I                   | Campina cerrado                         |
| 4        | PN07     | Granite, coarse | Entisol        | 1                | I                   | Campina cerrado                         |
| 5        | PN08     | Granite, coarse | Oxisol         | 3                | I                   | Campinarana                             |
| 6        | PN09     | Granite         | Ultisol        | 3                | III                 | Campinarana, disturbed                  |
| 7        | PN10     | Granite         | Oxisol         | 2                | III                 | Pasture with termitaria                 |
| 8        | PN11     | Granite         | Ultisol        | 2                | III                 | Primary forest, logged                  |
| 9        | PN12     | Granite         | Ultisol        | 2                | II                  | Primary forest, logged                  |
| 10       | PN14     | Granite         | Ultisol        | 2                | III                 | Pasture with termitaria                 |
| 11       | PN15     | Granite         | Ultisol        | 2                | III                 | Pasture with termitaria                 |
| 12       | PN16     | Granite comp.   | Ultisol/oxisol | 2                | III                 | Primary forest, logged                  |
| 13       | PN17     | Granite comp.   | Ultisol/oxisol | 2                | III                 | Secondary forest, <i>Cercropia</i>      |
| 14       | PN18     | Granite comp.   | Ultisol/oxisol | 2                | III                 | Subsistence garden > 1 yr old           |
| 15       | PN19     | Granite comp.   | Ultisol/oxisol | 2                | III                 | Subsistence garden < 1 yr old           |
| 16       | PN20     | Granite comp.   | Ultisol/oxisol | 2                | III                 | Cassava garden 2 years old              |
| 17       | PN21     | Granite         | (Shallow soil) | 2                | II                  | Primary forest, semi-deciduous          |
| 18       | PN22     | Granite         | Ultisol        | 2                | III                 | Pasture, degraded                       |
| 19       | PN23     | Granite         | Ultisol        | 2                | III                 | Teak plantation 5 years old             |
| 20       | PN24     | Granite         | Ultisol        | 3                | II                  | Primary forest, logged                  |
| 21       | PN25     | Granite         | Ultisol        | 2                | II                  | Primary forest, logged                  |
| 22       | PN26     | Granite         | Ultisol        | 2                | III                 | Primary forest, disturbed               |
| 23       | PN27     | Granite         | Ultisol        | 2                | III                 | Secondary forest (Capoéira 5 yrs)       |
| 24       | PN28     | Granite         | Ultisol        | 2                | III                 | Teak plantation and pasture             |
| 25       | PN29     | Granite         | Ultisol        | 2                | III                 | <i>Coffea</i> plantation, 20 months old |
| 26       | PN30     | Granite         | Ultisol        | 2                | III                 | Primary forest logged 11 years          |
| 27       | PN31     | Granite         | Ultisol        | 2                | II                  | Primary forest, disturbed               |
| 28       | PN32     | Granite         | Ultisol        | 2                | II                  | Pasture > 5 years old                   |
| 29       | PN33     | Granite         | Ultisol        | 2                | II                  | <i>Coffea</i> plantation 4 yrs old      |
| 30       | PN34     | Granite A       | (Shallow soil) | 4                | II                  | Primary forest, logged                  |
| 31       | PN35     | Granite B       | (Shallow soil) | 3                | II                  | Cerradão with succulents                |
| 32       | PN36     | Granite B       | (Shallow soil) | 3                | II                  | Cerradão, deciduous                     |

MT code = Pró-Natura site No., (Fauna site, T = Termites, F = other fauna); **Elev.:** Elevation; **Parent rock:** Granite comp. = granite and sedimentary complex, A = intermediate, B = intermediate to basic (apatite-biotite); **Soil type** (USDA soil taxonomy- Order); **Soil functional type:** 1= Sandstone derived, 2 = Well-drained - formed in acid igneous material, 3 = Poorly drained, 4 = High base status; **Landscape type:** I = Upland sandstones, II = Exposed granite outcrops and footslopes, III = Lowland plains with sediments

**Table S3 Site location, physical environment and land use type, Jambi, Sumatra, Indonesia**

| Transect No. | Location in Jambi Province | Latitude deg.min.sec. | Longitude deg.min.sec. | Elev'n (m) | Slope % | Aspect Deg. | Parent rock | Soil type | Land Use Type (LUT)                            |
|--------------|----------------------------|-----------------------|------------------------|------------|---------|-------------|-------------|-----------|------------------------------------------------|
| 1            | Pasir Mayang               | 01 04 47 S            | 102 06 02 E            | 76         | 25      | 7           | Sedim.      | Ultisol   | Intact primary rain forest                     |
| 2            | Pasir Mayang               | 01 04 45 S            | 102 05 53 E            | 60         | 36      | 115         | Sedim.      | Ultisol   | Intact primary rain forest                     |
| 3            | Pasir Mayang               | 01 04 43 S            | 102 05 55 E            | 85         | 12      | 150         | Sedim.      | Ultisol   | Secondary forest logged 1984                   |
| 4            | Pasir Mayang               | 01 04 53 S            | 102 06 09 E            | 90         | 45      | 130         | Sedim.      | Ultisol   | Secondary forest logged 79/80                  |
| 5            | Pasir Mayang               | 01 04 56 S            | 102 06 05 E            | 75         | 25      | 75          | Sedim.      | Ultisol   | Logged over primary forest                     |
| 6            | Pasir Mayang               | 01 04 59 S            | 102 06 43 E            | 65         | 20      | 202         | Sedim.      | Ultisol   | <i>Paraserianthes</i> plantation (3.5 yrs)     |
| 7            | Pasir Mayang               | 01 03 09 S            | 102 08 10 E            | 55         | 12      | 202         | Sedim.      | Ultisol   | <i>Paraserianthes</i> plantation (3.5 yrs)     |
| 8            | Pasir Mayang               | 01 05 25 S            | 102 07 05 E            | 53         | 3       | 183         | Sedim.      | Ultisol   | Rubber plantation 8 yrs                        |
| 9            | Pasir Mayang               | 01 05 27 S            | 102 06 56 E            | 53         | 3       | 188         | Sedim.      | Ultisol   | Rubber plantation 8 yrs                        |
| 10           | Pancuran Gading            | 01 10 12 S            | 102 06 50 E            | 30         | 0       | 0           | Sedim.      | Ultisol   | Jungle rubber agroforest                       |
| 11           | Pancuran Gading            | 01 10 13 S            | 102 06 46 E            | 30         | 0       | 0           | Sedim.      | Ultisol   | Jungle rubber agroforest                       |
| 12           | Kuamang Kuning             | 01 35 58 S            | 102 21 11 E            | 40         | 5       | 225         | Sedim.      | Ultisol   | <i>Imperata</i> degraded grassland             |
| 13           | Kuamang Kuning             | 01 35 56 S            | 102 21 12 E            | 40         | 5       | 130         | Sedim.      | Ultisol   | <i>Imperata</i> degraded grassland             |
| 14           | Kuamang Kuning             | 01 36 05 S            | 102 21 22 E            | 48         | 0       | 0           | Sedim.      | Ultisol   | Cassava plantation 10 yrs                      |
| 15           | Kuamang Kuning             | 01 36 05 S            | 102 21 21 E            | 48         | 9       | 311         | Sedim.      | Ultisol   | Cassava plantation 10 yrs                      |
| 16           | Pancuran Gading            | 01 10 13 S            | 102 06 58 E            | 30         | 0       | 0           | Sedim.      | Ultisol   | <i>Chromolaena</i> , <i>Clibadium</i> regrowth |



**Table S4. Vegetation summary data for NW Mato Grosso\***

| Transect No. | MT code | Spp. | PFTs | Spp.: PFTs | Ht    | C C<br>T w<br>ot dy | CC<br>nwdy | Litt. | FI    | B. area | Bryo. | Wdy<br>plts | PFC |     |
|--------------|---------|------|------|------------|-------|---------------------|------------|-------|-------|---------|-------|-------------|-----|-----|
| 1            | PN01    | 44   | 27   | 1.63       | 26.00 | 90                  | 90         | 0     | 5.00  | 25.75   | 58.00 | 4           | 7   | 324 |
| 2            | PN05    | 35   | 31   | 1.13       | 30.00 | 95                  | 95         | 0     | 3.00  | 26.00   | 32.67 | 5           | 5   | 375 |
| 3            | PN06    | 39   | 33   | 1.18       | 2.50  | 80                  | 65         | 15    | 2.50  | 77.25   | 1.00  | 1           | 7   | 334 |
| 4            | PN07    | 10   | 9    | 1.11       | 1.80  | 60                  | 30         | 30    | 0.10  | 92.40   | 1.00  | 1           | 7   | 83  |
| 5            | PN08    | 57   | 31   | 1.84       | 9.00  | 90                  | 85         | 5     | 12.00 | 26.75   | 26.67 | 3           | 7   | 305 |
| 6            | PN09    | 27   | 19   | 1.42       | 12.00 | 90                  | 90         | 0     | 15.00 | 20.55   | 27.33 | 4           | 2   | 160 |
| 7            | PN10    | 23   | 14   | 1.64       | 0.50  | 80                  | 20         | 78    | 0.50  | 46.25   | 0.01  | 0           | 1   | 104 |
| 8            | PN11    | 56   | 33   | 1.70       | 25.00 | 95                  | 95         | 0     | 6.00  | 29.75   | 20.67 | 5           | 8   | 364 |
| 9            | PN12    | 50   | 31   | 1.61       | 25.00 | 90                  | 90         | 0     | 7.00  | 21.75   | 23.33 | 4           | 8   | 324 |
| 10           | PN14    | 14   | 12   | 1.17       | 0.50  | 85                  | 5          | 80    | 0.50  | 59.50   | 0.01  | 0           | 1   | 90  |
| 11           | PN15    | 22   | 17   | 1.29       | 0.50  | 95                  | 5          | 90    | 0.50  | 63.00   | 0.01  | 1           | 1   | 129 |
| 12           | PN16    | 60   | 40   | 1.50       | 30.00 | 90                  | 90         | 0     | 7.00  | 23.50   | 32.67 | 5           | 7   | 366 |
| 13           | PN17    | 71   | 47   | 1.51       | 4.00  | 98                  | 95         | 3     | 7.00  | 32.40   | 4.67  | 2           | 6   | 456 |
| 14           | PN18    | 54   | 33   | 1.64       | 1.50  | 85                  | 40         | 45    | 0.30  | 79.70   | 0.10  | 1           | 6   | 275 |
| 15           | PN19    | 23   | 15   | 1.53       | 2.30  | 80                  | 75         | 5     | 0.50  | 85.00   | 0.67  | 1           | 1   | 88  |
| 16           | PN20    | 43   | 34   | 1.26       | 1.50  | 80                  | 75         | 5     | 2.00  | 36.80   | 1.00  | 1           | 8   | 379 |
| 17           | PN21    | 50   | 36   | 1.39       | 15.00 | 60                  | 60         | 0     | 12.00 | 41.25   | 16.67 | 6           | 7   | 368 |
| 18           | PN22    | 23   | 13   | 1.77       | 0.60  | 80                  | 75         | 5     | 0.50  | 80.00   | 0.01  | 1           | 1   | 81  |
| 19           | PN23    | 25   | 15   | 1.67       | 7.00  | 70                  | 65         | 5     | 18.00 | 39.00   | 14.67 | 1           | 7   | 106 |
| 20           | PN24    | 75   | 54   | 1.39       | 20.00 | 80                  | 70         | 10    | 5.00  | 16.25   | 24.67 | 7           | 8   | 596 |
| 21           | PN25    | 55   | 42   | 1.31       | 35.00 | 98                  | 95         | 3     | 7.00  | 14.75   | 22.67 | 6           | 5   | 436 |
| 22           | PN26    | 44   | 28   | 1.57       | 25.00 | 90                  | 90         | 0     | 3.00  | 26.50   | 27.33 | 4           | 5   | 249 |
| 23           | PN27    | 52   | 37   | 1.41       | 7.00  | 85                  | 75         | 10    | 6.00  | 58.65   | 11.33 | 1           | 6   | 388 |
| 24           | PN28    | 24   | 24   | 1.00       | 1.00  | 95                  | 5          | 90    | 7.00  | 10.00   | 1.00  | 1           | 1   | 239 |
| 25           | PN29    | 21   | 19   | 1.11       | 0.80  | 45                  | 45         | 0     | 0.30  | 30.40   | 0.10  | 1           | 8   | 148 |
| 26           | PN30    | 57   | 39   | 1.46       | 25.00 | 95                  | 95         | 0     | 8.00  | 21.00   | 32.00 | 6           | 8   | 423 |
| 27           | PN31    | 42   | 31   | 1.35       | 32.00 | 90                  | 90         | 0     | 5.00  | 30.50   | 28.00 | 3           | 6   | 345 |
| 28           | PN32    | 8    | 7    | 1.14       | 0.30  | 85                  | 0          | 85    | 0.20  | 100.00  | 0.00  | 1           | 1   | 40  |
| 29           | PN33    | 46   | 31   | 1.48       | 1.00  | 95                  | 15         | 80    | 3.00  | 24.35   | 0.50  | 1           | 6   | 292 |
| 30           | PN34    | 53   | 35   | 1.51       | 30.00 | 85                  | 85         | 0     | 7.00  | 17.75   | 20.67 | 4           | 9   | 419 |
| 31           | PN35    | 11   | 11   | 1.00       | 2.50  | 15                  | 5          | 10    | 0.01  | 10.00   | 0.33  | 1           | 0   | 111 |
| 32           | PN36    | 23   | 21   | 1.10       | 4.50  | 60                  | 60         | 0     | 5.00  | 65.00   | 58.00 | 3           | 1   | 214 |

\***Spp.** = plant species diversity; **PFTs** = plant functional type diversity; **spp.:PFTs** = ratio; **Ht** = mean canopy height (m); **CCTot** = canopy cover % total; **CCwdy** = canopy cover % woody plants; **CCnwdy** = canopy cover % non-woody plants; **Litt** = plant litter depth (cm); **FI** = mean furcation index; **B.area** = basal area all woody plants ( $m^2 ha^{-1}$ ) **Bryo** = Domin scale cover-abundance of bryophytes; **Wplts** = Domin scale cover-abundance of woody plants < 1.5 m tall; **PFC** = Plant Functional Complexity. Compiled using VegClass.

**Table S5. Vegetation summary data for Jambi, Sumatra\***

| Transect No. | Spp. | PFTs | Spp.:PFTs | Ht   | CC Tot | CC wdy | CC nwdy | Litt. | FI    | B. area | Bryo. | Wdy plts | PFC |
|--------------|------|------|-----------|------|--------|--------|---------|-------|-------|---------|-------|----------|-----|
| 1            | 102  | 37   | 2.76      | 21.0 | 75     | 70     | 5       | 10.0  | 13.50 | 27.33   | 2     | 7        | 182 |
| 2            | 101  | 36   | 2.81      | 20.0 | 65     | 60     | 5       | 10.0  | 15.50 | 32.67   | 5     | 5        | 214 |
| 3            | 50   | 20   | 2.50      | 10.0 | 35     | 20     | 15      | 15.0  | 10.25 | 13.33   | 3     | 6        | 122 |
| 4            | 108  | 39   | 2.77      | 24.0 | 80     | 70     | 10      | 6.0   | 9.50  | 32.67   | 3     | 7        | 192 |
| 5            | 113  | 38   | 2.97      | 28.0 | 70     | 65     | 5       | 8.0   | 9.75  | 27.33   | 4     | 6        | 210 |
| 6            | 42   | 27   | 1.56      | 6.0  | 85     | 40     | 45      | 3.0   | 43.75 | 6.00    | 1     | 4        | 144 |
| 7            | 46   | 33   | 1.39      | 16.0 | 75     | 30     | 45      | 6.0   | 16.50 | 8.00    | 2     | 5        | 192 |
| 8            | 65   | 36   | 1.81      | 11.0 | 85     | 65     | 20      | 5.0   | 39.25 | 14.67   | 4     | 4        | 194 |
| 9            | 54   | 29   | 1.86      | 12.0 | 75     | 60     | 15      | 5.0   | 41.50 | 15.33   | 4     | 4        | 150 |
| 10           | 112  | 47   | 2.38      | 14.0 | 80     | 65     | 15      | 8.0   | 38.50 | 18.00   | 3     | 6        | 236 |
| 11           | 98   | 41   | 2.39      | 14.0 | 75     | 65     | 10      | 6.0   | 40.25 | 20.67   | 3     | 7        | 198 |
| 12           | 10   | 10   | 1.00      | 1.0  | 90     | 5      | 85      | 0.1   | 0.00  | 0.33    | 1     | 1        | 86  |
| 13           | 7    | 7    | 1.00      | 1.0  | 90     | 5      | 85      | 0.1   | 0.00  | 0.33    | 1     | 0        | 66  |
| 14           | 14   | 11   | 1.27      | 1.8  | 50     | 35     | 15      | 0.5   | 98.75 | 0.33    | 1     | 5        | 50  |
| 15           | 19   | 13   | 1.46      | 1.8  | 40     | 30     | 10      | 0.2   | 98.00 | 0.33    | 1     | 4        | 92  |
| 16           | 42   | 34   | 1.24      | 2.0  | 95     | 75     | 20      | 4.0   | 71.50 | 0.33    | 1     | 9        | 176 |

\***Spp.** = plant species diversity; **PFT** = plant functional type diversity; **spp.:PFTs** = ratio; **Ht** = mean canopy height (m); **CCTot** = canopy cover % total; **CCwdy** = canopy cover % Woody plants; **CCnwdy** = canopy cover % non-woody plants; **Litt** = plant litter depth (cm); **FI** = mean furcation index; **B.area** = basal area all woody plants ( $m^2 ha^{-1}$ ) **Bryo** = Domin scale cover-abundance of bryophytes; **Wplts** = Domin scale cover-abundance of woody plants < 1.5 m tall; **PFC** = Plant Functional Complexity. Compiled using VegClass<sup>©</sup>

**Table S6. List of vascular plant species and PFTs collected in the Mato Grosso study area (sample page).\***

| Transect number | PFT                     | Family           | genus                | species           | quadrat |
|-----------------|-------------------------|------------------|----------------------|-------------------|---------|
| PN01            | na-la-do-fi-hc-ad       | Adiantaceae      | <i>Adiantum</i>      | 104               | 1       |
| PN01            | me-la-do-ch-li          | Bignoniaceae     | <i>Arabidaea</i>     | 107               | 1       |
| PN01            | no-co-do-de-ct-ph       | Moraceae         | <i>Brosimum</i>      | <i>guianensis</i> | 1       |
| PN01            | no-la-do-ct-ph          | Celastraceae     | <i>Cheiloclinium</i> | <i>cognatum</i>   | 1       |
| PN01            | pl-la-do-ph             | Meliaceae        | <i>Guarea</i>        | 106               | 1       |
| PN01            | no-la-do-ph             | Euphorbiaceae    | <i>Indet</i>         | 103               | 1       |
| PN01            | no-la-do-ct-ph          | Fabaceae         | <i>Indet</i>         | 109               | 1       |
| PN01            | me-la-do-ph             | Rutaceae         | <i>Metrodoria</i>    | <i>flavida</i>    | 1       |
| PN01            | me-la-do-ph             | Lauraceae        | <i>Ocotea</i>        | 111               | 1       |
| PN01            | pl-la-do-ph             | Cercropiaceae    | <i>Pouroma</i>       | 108               | 1       |
| PN01            | ma-la-do-ro-pv-ph       | Arecaceae        | <i>Socratea</i>      | <i>exorhiza</i>   | 1       |
| PN01            | no-la-do-fi-hc-li-ad-ep | Fern             | <i>Stenochlaena</i>  | 110               | 1       |
| PN01            | me-la-do-ch             | Loganiaceae      | <i>Strychnos</i>     | 113               | 1       |
| PN01            | me-la-do-ch-li          | Bignoniaceae     | <i>Arabidaea</i>     | 115               | 2       |
| PN01            | pl-la-do-ro-pv-ph       | Arecaceae        | <i>Astrocaryum</i>   | 116               | 2       |
| PN01            | no-la-do-pv-hc-ad       | Poaceae          | <i>Bambusa?</i>      | 114               | 2       |
| PN01            | no-la-do-ph-li          | Indet            | <i>Indet</i>         | 118               | 2       |
| PN01            | me-la-do-ph             | Tiliaceae        | <i>Indet</i>         | 119               | 2       |
| PN01            | me-ve-do-su-hc-li-ad-ep | Araceae2         | <i>Indet</i>         | 121               | 2       |
| PN01            | na-la-do-fi-hc-ad       | Fern             | <i>Indet</i>         | 122               | 2       |
| PN01            | pi-la-do-ph             | Rubiaceae        | <i>Isertia</i>       | 117               | 2       |
| PN01            | me-la-do-ph             | Sapotaceae       | <i>Pouteria</i>      | 120               | 2       |
| PN01            | pi-la-do-ph             | Lauraceae        | <i>Aniba</i>         | 126               | 3       |
| PN01            | pl-la-do-ch-li          | Bignoniaceae     | <i>Bignonia</i>      | 125               | 3       |
| PN01            | me-la-do-ch-li          | Bignoniaceae     | <i>Cuspidaria</i>    | 128               | 3       |
| PN01            | me-la-do-ch-li          | Mimosaceae       | <i>Indet</i>         | 127               | 3       |
| PN01            | pl-la-do-pv-hc-ad       | Marantaceae      | <i>Maranta</i>       | 124               | 3       |
| PN01            | me-la-do-ph-ad          | Quiinaceae       | <i>Quiina</i>        | 123               | 3       |
| PN01            | pl-la-do-ch-li          | Fabaceae         | <i>Indet</i>         | 129               | 4       |
| PN01            | me-la-do-ch             | Lauraceae        | <i>Nectandra</i>     | 130               | 4       |
| PN01            | ma-la-is-ro-pv-hc-ad    | Bromeliaceae     | <i>Ananas</i>        | 144               | 5       |
| PN01            | no-la-do-ph             | Chrysobalanaceae | <i>Hirtella</i>      | <i>ciliata</i>    | 5       |
| PN01            | mi-la-do-hc-ad          | Rubiaceae        | <i>Indet</i>         | 134               | 5       |
| PN01            | mi-la-do-ch-li          | Fabaceae         | <i>Indet</i>         | 136               | 5       |
| PN01            | ma-la-do-ct-ph          | Cercropiaceae    | <i>Pourouma</i>      | 131               | 5       |
| PN01            | mi-la-do-ph             | Burseraceae      | <i>Protium</i>       | <i>pilosa</i>     | 5       |
| PN01            | no-la-do-ct-ph          | Meliaceae        | <i>Trichilia</i>     | 132               | 5       |
| PN01            | no-la-do-su-hc-ad       | Piperaceae       | <i>Piper</i>         | 138               | 6       |
| PN01            | no-co-do-pv-hc-ad       | Cyperaceae       | <i>Scleria</i>       | <i>corymbosa</i>  | 6       |
| PN01            | me-pe-do-pv-hc-li-ad-ep | Araceae          | <i>Indet</i>         | 142               | 7       |
| PN01            | na-ve-do-de-ph          | Mimosaceae       | <i>Parkia</i>        | <i>multijuga</i>  | 7       |
| PN01            | me-la-do-ch             | Rubiaceae        | <i>Psychotria</i>    | 141               | 7       |
| PN01            | pl-la-do-ph             | Sterculiaceae    | <i>Theobroma</i>     | <i>sylvestris</i> | 7       |

\* Full tables are available on request from contact author

**Table S7. List of vascular plant species and PFTs collected in the Jambi, Sumatra study area (sample page).\***

| Transect number | PFT                  | Family           | genus                | species             | authority           |
|-----------------|----------------------|------------------|----------------------|---------------------|---------------------|
| BS01            | no-co-do-ph          | Sapindaceae      | <i>Xerospermum</i>   | <i>noronhianum</i>  | Blume               |
| BS01            | no-la-do-ct-ph       | Burseraceae      | <i>Dacryodes</i>     | <i>rugosa</i>       | (Blume) H.J. Lam    |
| BS01            | mi-ve-do-ph          | Fabaceae         | <i>Sindora</i>       | <i>leiocarpa</i>    | Backer ex. K. Heyne |
| BS01            | no-la-do-ph          | Myristicaceae    | <i>Knema</i>         | <i>cinerea</i>      | (Poir.) Warb.       |
| BS01            | no-co-do-ph          | Myrtaceae        | <i>Eugenia</i>       | <i>ochneocarpa</i>  | Merr.               |
| BS01            | me-co-do-ph          | Myristicaceae    | <i>Knema</i>         | <i>mandahoran</i>   | (Miq.) Warb.        |
| BS01            | me-la-do-de-ph       | Sterculiaceae    | <i>Scaphium</i>      | <i>macropodum</i>   | (Miq.) Beume        |
| BS01            | me-la-do-ph          | Annonaceae       | <i>Polyalthia</i>    | <i>lateriflora</i>  | (Blume) King.       |
| BS01            | no-co-do-ph          | Sapotaceae       | <i>Palaquium</i>     | <i>gutta</i>        | (Hook.f.) Baillon   |
| BS01            | pl-la-do-ph          | Myristicaceae    | <i>Horsfieldia</i>   | <i>grandis</i>      | (Blume) Warb        |
| BS01            | no-ve-do-ph          | Burseraceae      | <i>Santiria</i>      | <i>graffithii</i>   | (Hook.f.) Engl.     |
| BS01            | no-ve-do-ph          | Myrtaceae        | <i>Eugenia</i>       | <i>palembanica</i>  | (Miq.) Merr.        |
| BS01            | no-co-do-ph          | Theaceae         | <i>Gordonia</i>      | sp13                | (empty)             |
| BS01            | mi-ve-do-ph          | Fabaceae         | <i>Koompassia</i>    | <i>malaccensis</i>  | Maing. ex Benth.    |
| BS01            | mi-la-do-ph          | Trigoniaceae     | <i>Trigoniastrum</i> | <i>hypoleucum</i>   | Miq.                |
| BS01            | no-la-do-ph          | Ulmaceae         | <i>Giromiera</i>     | <i>hirta</i>        | Ridl.               |
| BS01            | no-ve-do-ph          | Dipterocarpaceae | <i>Shorea</i>        | <i>macropera</i>    | Dyer                |
| BS01            | no-la-do-ph          | Moraceae         | <i>Artocarpus</i>    | <i>anisophyllus</i> | Miq.                |
| BS01            | no-la-do-ct-ph       | Euphorbiaceae    | <i>Drypetes</i>      | <i>longifolia</i>   | Pax. & Hoffm.       |
| BS01            | no-la-do-ct-ph       | Fabaceae         | <i>Fordia</i>        | <i>johorensis</i>   | T.C. Whitm.         |
| BS01            | no-la-do-ct-ph       | Thymelaeaceae    | <i>Gonystylus</i>    | <i>maingayi</i>     | Hook.f.             |
| BS01            | mi-la-do-ct-ph       | Connaraceae      | <i>Agelaea</i>       | <i>borneensis</i>   | (Hook.f.) Merr.     |
| BS01            | no-la-do-ph          | Lecythidaceae    | <i>Barringtonia</i>  | <i>scortechinii</i> | King                |
| BS01            | me-la-do-ph          | Rubiaceae        | <i>Timonius</i>      | <i>stipulosus</i>   | (Scheff.) Boerl.    |
| BS01            | me-la-do-ph-li       | Dilleniaceae     | <i>Tetracera</i>     | <i>scandens</i>     | (L.) Merr.          |
| BS01            | no-la-do-ph-li       | Connaraceae      | <i>Connarus</i>      | <i>monocarpus</i>   | L.                  |
| BS01            | ma-la-do-ro-pv-ph    | Arecaceae        | <i>Licuala</i>       | <i>spinosa</i>      | Wurmb.              |
| BS01            | me-la-do-ph          | Burseraceae      | <i>Dacryodes</i>     | <i>incurvata</i>    | (Engler.) H.J. Lam  |
| BS01            | no-la-do-ph          | Flacourtiaceae   | <i>Hydnocarpus</i>   | <i>polipetala</i>   | (v. Sloat.) Sleumer |
| BS01            | no-la-do-ph          | Sapotaceae       | <i>Madhuca</i>       | <i>sandakaensis</i> | van Royen           |
| BS01            | me-la-do-ph          | Celastraceae     | <i>Bhesa</i>         | <i>paniculata</i>   | Arn.                |
| BS01            | no-la-do-ph          | Annonaceae       | <i>Polyalthia</i>    | <i>beccarii</i>     | King                |
| BS01            | me-la-do-ph-li       | Connaraceae      | <i>Agelaea</i>       | <i>macrophylla</i>  | (Zoll.) Leenh.      |
| BS01            | na-la-do-ph-li       | Fabaceae         | <i>Derris</i>        | sp34                | (empty)             |
| BS01            | me-la-do-ro-pv-hc    | Arecaceae        | <i>Licuala</i>       | <i>ferruginea</i>   | Becc.               |
| BS01            | no-la-do-ph          | Thymelaeaceae    | <i>Gonystylus</i>    | <i>velutinus</i>    | Airy Shaw           |
| BS01            | mi-la-do-ph-li       | Connaraceae      | <i>Rourea</i>        | <i>minor</i>        | (Gaertn.) Leenh.    |
| BS01            | no-la-do-ph          | Euphorbiaceae    | <i>Aporusa</i>       | <i>subcaudata</i>   | Merr.               |
| BS01            | mi-la-do-su-hc-ad-ep | Piperaceae       | <i>Piper</i>         | sp39                | (empty)             |
| BS01            | mi-la-do-ph-li       | Annonaceae       | <i>Desmos</i>        | <i>chinensis</i>    | Lour.               |

\* Species contained in quadrat 1. Complete list available from contact author

**Table S8. Vertebrate fauna listed according to Class and transect in NW Mato Grosso\***

| Class | Family         | Species                                           | MT Code  | Transect No. |
|-------|----------------|---------------------------------------------------|----------|--------------|
| AVES  | Falconidae     | <i>Daptrius ater</i> (Vieillot, 1816)             | PN 05    | 2            |
| AVES  | Cracidae       | <i>Pipile cajúbi</i> (Pelzen, 1858)               | PN 05    | 2            |
| AVES  | Emberizidae    | <i>Psarocolius decumanus</i> (Pallas, 1769)       | PN 05    | 2            |
| AVES  | Ramphastidae   | <i>Ramphastos vitellinus</i> (Lichtenstein, 1823) | PN 05    | 2            |
| AVES  | Psittacidae    | <i>Amazona aestiva</i> (Linnaeus, 1758)           | PN 05    | 2            |
| AVES  | Psittacidae    | <i>Ara ararauna</i> (Linnaeus, 1758)              | PN 05    | 2            |
| AVES  | Psittacidae    | <i>Ara macao</i> (Linnaeus, 1758)                 | PN 05    | 2            |
| AVES  | Psittacidae    | <i>Deroytus acciptinus</i> (Linnaeus, 1758)       | PN 05    | 2            |
| AVES  | Psittacidae    | <i>Pionus menstruus</i> (Linnaeus, 1766)          | PN 05    | 2            |
| AVES  | Caprimulgidae  | <i>Caprimulgus nigrescens</i> (Cabanis, 1848)s    | PN 06/07 | 3/4          |
| AVES  | Acciptridae    | <i>Buteo magnirostris</i> (Gmelin, 1758)          | PN 06/07 | 3/4          |
| AVES  | Falconidae     | <i>Herpethotes cachinnans</i> (Linnaeus, 1758)    | PN 06/07 | 3/4          |
| AVES  | Emberizidae    | <i>Euphonia chlorotica</i> (Linnaeus, 1766)       | PN 06/07 | 3/4          |
| AVES  | Tyrannidae     | <i>Megarynchus pitangua</i> (Linnaeus, 1766)      | PN 06/07 | 3/4          |
| AVES  | Tyrannidae     | <i>Myiozetetes cayenensis</i> (Linnaeus, 1766)    | PN 06/07 | 3/4          |
| AVES  | Tyrannidae     | <i>Tyrannus melancholicus</i> (Vieillot, 1819)    | PN 06/07 | 3/4          |
| AVES  | Psittacidae    | <i>Ara macao</i> (Linnaeus, 1758)                 | PN 06/07 | 3/4          |
| AVES  | Tinamidae      | <i>Rhynchotus rufescens</i> (Temminck, 1815)      | PN 06/07 | 3/4          |
| AVES  | Emberizidae    | <i>Cacicus cela</i> (Linnaeus, 1758)              | PN 08    | 5            |
| AVES  | Emberizidae    | <i>Sporophila caerulea</i> (Vieillot, 1823)       | PN 08    | 5            |
| AVES  | Emberizidae    | <i>Tangara chilensis</i> (Vigor, 1832)            | PN 08    | 5            |
| AVES  | Muscicapidae   | <i>Turdus amaurochalinus</i> (Cabanis, 1851)      | PN 09    | 6            |
| AVES  | Columbidae     | <i>Columbina talpacoti</i> (Temminck, 1811)       | PN 11    | 8            |
| AVES  | Hirundinidae   | <i>Reinarda squamata</i> (Cassin, 1853)           | PN 11    | 8            |
| AVES  | Bucconidae     | <i>Monasa morphoeus</i> (Hahn & Kuster, 1823)     | PN 11    | 8            |
| AVES  | Trogonidae     | <i>Trogon curucui</i> (Linnaeus, 1766)            | PN 11    | 8            |
| AVES  | Trochilidae    | <i>Phaethornis ruber</i> (Linnaeus, 1758)         | PN 16    | 12           |
| AVES  | Columbidae     | <i>Leptotila verreauxi</i> (Bonaparte, 1855)      | PN 16    | 12           |
| AVES  | Corvidae       | <i>Cyanocorax crysops</i> (Vieillot, 1818)        | PN 16    | 12           |
| AVES  | Cotigidae      | <i>Lipaugus vociferans</i> (Wied, 1820)           | PN 16    | 12           |
| AVES  | Bucconidae     | <i>Chelidoptera tenebrosa</i> (Pallas, 1782)      | PN 16    | 12           |
| AVES  | Ramphastidae   | <i>Ramphastos vitellinus</i> (Lichtenstein, 1823) | PN 16    | 12           |
| AVES  | Psittacidae    | (Hellmayr, 1906)                                  | PN 16    | 12           |
| AVES  | Psittacidae    | <i>Amazona aestiva</i> (Linnaeus, 1758)           | PN 16    | 12           |
| AVES  | Psittacidae    | <i>Ara ararauna</i> (Linnaeus, 1758)              | PN 16    | 12           |
| AVES  | Psittacidae    | <i>Ara macao</i> (Linnaeus, 1758)                 | PN 16    | 12           |
| AVES  | Psittacidae    | <i>Brothogeris chrysopteris</i> (Linnaeus, 1766)  | PN 16    | 12           |
| AVES  | Columbidae     | <i>Columbina talpacoti</i> (Temminck, 1811)       | PN 17    | 13           |
| AVES  | Cuculidae      | <i>Crotophaga ani</i> (Linnaeus, 1758)            | PN 17    | 13           |
| AVES  | Emberizidae    | <i>Thraupis palmarum</i> (Weid, 1821)             | PN 17    | 13           |
| AVES  | Troglodytidae  | <i>Campylorhynchus turdinus</i> (Weid, 1821)      | PN 17    | 13           |
| AVES  | Psittacidae    | <i>Ara macao</i> (Linnaeus, 1758)                 | PN 17    | 13           |
| AVES  | Columbidae     | <i>Columbina talpacoti</i> (Temminck, 1811)       | PN 19    | 15           |
| AVES  | Cuculidae      | <i>Crotophaga ani</i> (Linnaeus, 1758)            | PN 19    | 15           |
| AVES  | Formicariidae  | <i>Formicarius colma</i>                          | PN 19    | 15           |
| AVES  | Phasianidae    | <i>Gallus gallus</i> (Linnaeus, 1758)**           | PN 19    | 15           |
| AVES  | Thamnophilidae | <i>Thamnophilus doliatus</i> (Linnaeus, 1764)     | PN 19    | 15           |
| AVES  | Columbidae     | <i>Columbina talpacoti</i> (Temminck, 1811)       | PN 20    | 16           |
| AVES  | Cuculidae      | <i>Crotophaga ani</i> (Linnaeus, 1758)            | PN 20    | 16           |
| AVES  | Emberizidae    | <i>Cissops leveriana</i> (Gmelin, 1788)           | PN 20    | 16           |
| AVES  | Emberizidae    | <i>Coryphospingus cuculatus</i> (Müller, 1776)    | PN 20    | 16           |
| AVES  | Emberizidae    | <i>Ramphocelus carbo</i> (Pallas, 1764)           | PN 20    | 16           |
| AVES  | Emberizidae    | <i>Scaphidura oryzivora</i> (Linnaeus, 1758)      | PN 20    | 16           |
| AVES  | Emberizidae    | <i>Volatina jacarina</i> (Linnaeus, 1766)         | PN 20    | 16           |
| AVES  | Tyrannidae     | <i>Myiarchus tyrannulus</i> Müller, (1776)        | PN 20    | 16           |
| AVES  | Charadriidae   | <i>Vanellus chilensis</i> (Gmelin, 1789)          | PN 22    | 18           |
| AVES  | Scolopacidae   | <i>Tringa solitaria</i> (Wilson, 1813)            | PN 22    | 18           |
| AVES  | Ardeidae       | <i>Bubulcus ibis</i> (Linnaeus, 1758)             | PN 22    | 18           |
| AVES  | Cuculidae      | <i>Crotophaga ani</i> (Linnaeus, 1758)            | PN 22    | 18           |
| AVES  | Emberizidae    | <i>Leistes militaris</i> (Linnaeus, 1758)         | PN 22    | 18           |
| AVES  | Emberizidae    | <i>Ramphocelus carbo</i> (Pallas, 1764)           | PN 22    | 18           |
| AVES  | Psittacidae    | <i>Ara ararauna</i> (Linnaeus, 1758)              | PN 22    | 18           |

| Class    | Family           | Species                                           | MT Code  | Transect No. |
|----------|------------------|---------------------------------------------------|----------|--------------|
| AVES     | Psittacidae      | <i>Pionus menstruus</i> (Linnaeus, 1766)          | PN 22    | 18           |
| AVES     | Columbidae       | <i>Columbina talpacoti</i> (Temminck, 1811)       | PN 23    | 19           |
| AVES     | Accipitridae     | <i>Buteo magnirostris</i> (Gmelin, 1758)          | PN 23    | 19           |
| AVES     | Emberizidae      | <i>Thraupis palmarum</i> (Wied, 1821)             | PN 23    | 19           |
| AVES     | Cotigidae        | <i>Lipaugus vociferans</i> (Wied, 1820)           | PN 26    | 22           |
| AVES     | Dendrocolaptidae | <i>Sittasomus griseicapillus</i> (Vieillot, 1818) | PN 26    | 22           |
| AVES     | Emberizidae      | <i>Thraupis palmarum</i> (Weid, 1821)             | PN 26    | 22           |
| AVES     | Muscicapidae     | <i>Turdus amaurochalinus</i> (Cabanis, 1851)      | PN 26    | 22           |
| AVES     | Troglodytidae    | <i>Cyphorhinus arada</i> (Hermann, 1783)          | PN 26    | 22           |
| AVES     | Tyrannidae       | <i>Myiozetetes cayenensis</i> (Linnaeus, 1766)    | PN 26    | 22           |
| AVES     | Picidae          | <i>Melanerpes cruentatus</i> (Boddaert, 1783)     | PN 26    | 22           |
| AVES     | Trogonidae       | <i>Trogon curucui</i> (Linnaeus, 1766)            | PN 26    | 22           |
| AVES     | Caprimulgidae    | <i>Caprimulgus maculicaudus</i> (Lawrence, 1862)  | PN 27    | 23           |
| AVES     | Emberizidae      | <i>Ramphocelus carbo</i> (Pallas, 1764)           | PN 27    | 23           |
| AVES     | Thamnophilidae   | <i>Myrmeciza atrotorax</i> (Boddaert, 1783)       | PN 27    | 23           |
| AVES     | Tinamidae        | <i>Crypturellus parvirostris</i> (Wagler, 1827)   | PN 27    | 23           |
| AVES     | Charadriidae     | <i>Vanellus chilensis</i> (Gmelin, 1789)          | PN 28    | 24           |
| AVES     | Columbidae       | <i>Columba cayennensis</i> (Bonnaterre, 1792)     | PN 28    | 24           |
| AVES     | Cuculidae        | <i>Crotophaga ani</i> (Linnaeus, 1758)            | PN 28    | 24           |
| AVES     | Psittacidae      | <i>Ara auricollis</i> (Cassin, 1853)              | PN 28    | 24           |
| MAMMALIA | Tayassuidae      | <i>Tayassu pecari</i> (Link, 1795)                | PN 05    | 2            |
| MAMMALIA | Tapiridae        | <i>Tapirus terrestris</i> (Linnaeus, 1758)        | PN 05    | 2            |
| MAMMALIA | Dasyproctidae    | <i>Dasyprocta azarae</i> (Lichtenstein, 1823)     | PN 05    | 2            |
| MAMMALIA | Cervidae         | <i>Mazama americana</i> (Erxleben, 1777)          | PN 06/07 | 3/4          |
| MAMMALIA | Tayassuidae      | <i>Tayassu pecari</i> (Link, 1795)                | PN 06/07 | 3/4          |
| MAMMALIA | Hydrochaeridae   | <i>Hydrochaeris hydrochaeris</i> (Linnaeus, 1766) | PN 06/07 | 3/4          |
| MAMMALIA | Tayassuidae      | <i>Tayassu pecari</i> (Link, 1795)                | PN 08    | 5            |
| MAMMALIA | Myrmecophagidae  | <i>Tamandua tetradactyla</i> (Linnaeus, 1758)     | PN 08    | 5            |
| MAMMALIA | Cervidae         | <i>Mazama americana</i> (Erxleben, 1777)          | PN 09    | 6            |
| MAMMALIA | Tayassuidae      | <i>Pecari tajacu</i> (Linnaeus, 1758)             | PN 09    | 6            |
| MAMMALIA | Canidae          | <i>Cerdocyon thous</i> (Linnaeus, 1766)           | PN 09    | 6            |
| MAMMALIA | Myrmecophagidae  | <i>Tamandua tetradactyla</i> (Linnaeus, 1758)     | PN 09    | 6            |
| MAMMALIA | Tapiridae        | <i>Tapirus terrestris</i> (Linnaeus, 1758)        | PN 09    | 6            |
| MAMMALIA | Tayassuidae      | <i>Pecari tajacu</i> (Linnaeus, 1758)             | PN 11    | 8            |
| MAMMALIA | Dasypodidae      | <i>Dasypus novemcinctus</i> (Linnaeus, 1758)      | PN 11    | 8            |
| MAMMALIA | Tapiridae        | <i>Tapirus terrestris</i> (Linnaeus, 1758)        | PN 11    | 8            |
| MAMMALIA | Suidae           | <i>Sus scrofa domesticus</i>                      | PN 16    | 12           |
| MAMMALIA | Tayassuidae      | <i>Tayassu pecari</i> (Link, 1795)                | PN 16    | 12           |
| MAMMALIA | Canidae          | <i>Canis familiaris</i> Linnaeus (1758)           | PN 16    | 12           |
| MAMMALIA | Felidae          | <i>Felis catus</i> Linnaeus (1758)                | PN 16    | 12           |
| MAMMALIA | Dasypodidae      | <i>Dasypus kappleri</i> (Krauss, 1862)            | PN 16    | 12           |
| MAMMALIA | Dasypodidae      | <i>Dasypus sp</i>                                 | PN 16    | 12           |
| MAMMALIA | Tapiridae        | <i>Tapirus terrestris</i> (Linnaeus, 1758)        | PN 16    | 12           |
| MAMMALIA | Cebidae          | <i>Lagotrix lagotricha</i> (Humboldt, 1812)       | PN 16    | 12           |
| MAMMALIA | Dasyproctidae    | <i>Dasyprocta azarae</i> (Lichtenstein, 1823)     | PN 16    | 12           |
| MAMMALIA | Dasypodidae      | <i>Dasypus novemcinctus</i> (Linnaeus, 1758)      | PN 19    | 15           |
| MAMMALIA | Muridae          | <i>Oryzomys sp</i>                                | PN 19    | 15           |
| MAMMALIA | Dasypodidae      | <i>Dasypus sp</i>                                 | PN 20    | 16           |
| MAMMALIA | Cervidae         | <i>Mazama americana</i> (Erxleben, 1777)          | PN 24    | 20           |
| MAMMALIA | Tayassuidae      | <i>Tayassu pecari</i> (Link, 1795)                | PN 24    | 20           |
| MAMMALIA | Tapiridae        | <i>Tapirus terrestris</i> (Linnaeus, 1758)        | PN 24    | 20           |
| MAMMALIA | Cebidae          | <i>Lagotrix lagotricha</i> (Humboldt, 1812)       | PN 24    | 20           |
| MAMMALIA | Agoutidae        | <i>Agouti paca</i> (Linnaeus, 1766)               | PN 24    | 20           |
| MAMMALIA | Cebidae          | <i>Lagotrix lagotricha</i> (Humboldt, 1812)       | PN 26    | 22           |
| MAMMALIA | Agoutidae        | <i>Agouti paca</i> (Linnaeus, 1766)               | PN 26    | 22           |
| MAMMALIA | Dasyproctidae    | <i>Dasyprocta azarae</i> (Lichtenstein, 1823)     | PN 26    | 22           |
| MAMMALIA | Suidae           | <i>Sus scrofa domesticus</i>                      | PN 27    | 23           |
| MAMMALIA | Tapiridae        | <i>Tapirus terrestris</i> (Linnaeus, 1758)        | PN 27    | 23           |

\* Source: I.C.L Assumpção, D.M. de Oliveira, R.J.V. Neto

**Table S9. Vertebrate (mammal) fauna recorded in Jambi, Sumatra, Indonesia\***

| No. | Family           | Species                          | Tr<br>1 | Tr<br>2 | Tr<br>3 | Tr<br>4 | Tr<br>5 | Tr<br>6 | Tr<br>7 | Tr<br>8 | Tr<br>9 | Tr<br>10 | Tr<br>11 | Tr<br>12 | Tr<br>13 | Tr<br>14 | Tr<br>15 |
|-----|------------------|----------------------------------|---------|---------|---------|---------|---------|---------|---------|---------|---------|----------|----------|----------|----------|----------|----------|
| 1   | Cercopithecidae  | <i>Macaca fascicularis</i>       | 1       | 1       | 1       | 0       | 1       | 0       | 0       | 0       | 0       | 0        | 0        | 0        | 0        | 0        | 0        |
| 2   | Cercopithecidae  | <i>Presbytis melalophos</i>      | 1       | 1       | 1       | 1       | 1       | 1       | 0       | 1       | 1       | 1        | 1        | 0        | 0        | 0        | 0        |
| 3   | Cercopithecidae  | <i>Trachypitecus cristatus</i>   | 0       | 0       | 1       | 0       | 0       | 0       | 0       | 0       | 0       | 1        | 1        | 0        | 0        | 0        | 0        |
| 4   | Cervidae         | <i>Cervus unicolor</i>           | 0       | 0       | 0       | 0       | 0       | 0       | 1       | 0       | 0       | 1        | 1        | 0        | 0        | 1        | 1        |
| 5   | Cervidae         | <i>Muntiacus muntjak</i>         | 0       | 0       | 0       | 0       | 1       | 0       | 0       | 0       | 0       | 0        | 0        | 0        | 0        | 0        | 0        |
| 6   | Felidae          | <i>Felis bengalensis</i>         | 0       | 0       | 0       | 0       | 0       | 0       | 0       | 1       | 1       | 0        | 0        | 0        | 0        | 0        | 0        |
| 7   | Hylobatidae      | <i>Hylobates lar agilis</i>      | 1       | 0       | 1       | 1       | 1       | 1       | 1       | 0       | 0       | 0        | 0        | 0        | 0        | 0        | 0        |
| 8   | Muridae          | <i>Maxomys rajah</i>             | 1       | 1       | 0       | 1       | 1       | 0       | 0       | 0       | 0       | 0        | 0        | 0        | 0        | 0        | 0        |
| 9   | Muridae          | <i>Maxomys whiteheadi</i>        | 0       | 0       | 1       | 1       | 1       | 1       | 0       | 1       | 1       | 1        | 1        | 0        | 0        | 0        | 0        |
| 10  | Muridae          | <i>Rattus rattus</i>             | 0       | 0       | 0       | 0       | 0       | 1       | 0       | 0       | 0       | 0        | 0        | 0        | 0        | 0        | 0        |
| 11  | Muridae          | <i>Rattus exulans</i>            | 0       | 0       | 0       | 0       | 0       | 1       | 1       | 1       | 1       | 0        | 0        | 1        | 1        | 0        | 0        |
| 12  | Muridae          | <i>Rattus tiomanicus</i>         | 0       | 0       | 0       | 0       | 0       | 0       | 0       | 0       | 0       | 0        | 0        | 1        | 1        | 0        | 0        |
| 13  | Pteropodidae     | <i>Pteropus vampirus</i>         | 1       | 0       | 0       | 0       | 0       | 0       | 0       | 0       | 0       | 0        | 0        | 0        | 0        | 0        | 0        |
| 14  | Pteropodidae     | <i>Balionycteris maculata</i>    | 0       | 0       | 0       | 1       | 1       | 0       | 0       | 0       | 0       | 0        | 0        | 0        | 0        | 0        | 0        |
| 15  | Pteropodidae     | <i>Cynopterus brachyotis</i>     | 0       | 0       | 0       | 0       | 0       | 0       | 0       | 1       | 1       | 1        | 1        | 0        | 0        | 0        | 0        |
| 16  | Pteropodidae     | <i>Rousettus amplexicaudatus</i> | 0       | 0       | 0       | 0       | 0       | 1       | 0       | 0       | 0       | 0        | 0        | 0        | 0        | 0        | 0        |
| 17  | Rhinolophidae    | <i>Rhinolophus lepidus</i>       | 0       | 0       | 0       | 1       | 1       | 0       | 0       | 0       | 0       | 0        | 0        | 0        | 0        | 0        | 0        |
| 18  | Sciuridae        | <i>Callosciurus prevostii</i>    | 1       | 0       | 0       | 1       | 0       | 1       | 0       | 1       | 1       | 1        | 1        | 0        | 0        | 0        | 0        |
| 19  | Sciuridae        | <i>Petinomys genigarbis</i>      | 0       | 0       | 0       | 1       | 0       | 0       | 0       | 0       | 0       | 0        | 0        | 0        | 0        | 0        | 0        |
| 20  | Sciuridae        | <i>Ratufa affinis</i>            | 0       | 0       | 0       | 0       | 0       | 1       | 0       | 0       | 0       | 0        | 0        | 0        | 0        | 0        | 0        |
| 21  | Sciuridae        | <i>Sundasciurus hippurus</i>     | 0       | 0       | 0       | 0       | 0       | 0       | 0       | 0       | 0       | 1        | 1        | 0        | 0        | 0        | 0        |
| 22  | Sciuridae        | <i>Callosciurus notatus</i>      | 0       | 0       | 0       | 0       | 0       | 0       | 0       | 0       | 0       | 1        | 1        | 0        | 0        | 0        | 0        |
| 23  | Sciuridae        | <i>Sundasciurus lowii</i>        | 0       | 0       | 0       | 0       | 0       | 0       | 0       | 0       | 0       | 1        | 1        | 0        | 0        | 0        | 0        |
| 24  | Suidae           | <i>Sus barbatus</i>              | 1       | 1       | 0       | 1       | 0       | 1       | 1       | 1       | 1       | 1        | 1        | 0        | 0        | 0        | 0        |
| 25  | Suidae           | <i>Sus scrofa</i>                | 0       | 0       | 0       | 0       | 0       | 0       | 0       | 0       | 0       | 0        | 0        | 1        | 1        | 1        | 1        |
| 26  | Tragulidae       | <i>Tragulus javanicus</i>        | 0       | 0       | 0       | 1       | 0       | 0       | 0       | 0       | 0       | 0        | 0        | 0        | 0        | 0        | 0        |
| 27  | Tupaiaidae       | <i>Tupaia tana</i>               | 0       | 0       | 0       | 0       | 0       | 0       | 0       | 0       | 0       | 1        | 1        | 0        | 0        | 0        | 0        |
| 28  | Tupaiaidae       | <i>Tupaia glis</i>               | 0       | 0       | 0       | 0       | 0       | 0       | 0       | 0       | 0       | 1        | 1        | 0        | 0        | 0        | 0        |
| 29  | Ursidae          | <i>Helarctos malayanus</i>       | 1       | 1       | 0       | 0       | 0       | 1       | 0       | 0       | 0       | 0        | 0        | 0        | 0        | 0        | 0        |
| 30  | Vespertilionidae | <i>Pipistrellus javanicus</i>    | 0       | 0       | 0       | 0       | 0       | 0       | 1       | 0       | 0       | 0        | 0        | 0        | 0        | 0        | 0        |
| 31  | Viverridae       | <i>Hemigalus derbyanus</i>       | 1       | 0       | 0       | 0       | 0       | 0       | 0       | 0       | 0       | 0        | 0        | 0        | 0        | 0        | 0        |

\*Source: I. Maryanto

**Table S10. Vertebrate (bird) fauna listed according to family and transect in Jambi, Sumatra, Indonesia\***

| Family        | Species                           | Tr<br>1 | Tr<br>2 | Tr<br>3 | Tr<br>4 | Tr<br>5 | Tr<br>6 | Tr<br>7 | Tr<br>8 | Tr<br>10 | Tr<br>12 | Tr<br>13 | Tr<br>16 |
|---------------|-----------------------------------|---------|---------|---------|---------|---------|---------|---------|---------|----------|----------|----------|----------|
| Accipitridae  | <i>Accipiter gularis</i>          | 0       | 0       | 0       | 0       | 0       | 0       | 1       | 1       | 0        | 0        | 0        | 0        |
| Accipitridae  | <i>Accipiter trivirgatus</i>      | 0       | 0       | 1       | 0       | 1       | 0       | 0       | 0       | 0        | 0        | 0        | 0        |
| Alcedinidae   | <i>Ceyx erithacus</i>             | 1       | 1       | 0       | 0       | 1       | 0       | 0       | 0       | 0        | 0        | 0        | 0        |
| Alcedinidae   | <i>Halcyon smyrnensis</i>         | 0       | 0       | 0       | 0       | 0       | 0       | 1       | 1       | 0        | 1        | 1        | 0        |
| Anatidae      | <i>Dendrocygna arcuata</i>        | 0       | 0       | 0       | 0       | 0       | 0       | 0       | 0       | 0        | 1        | 0        | 0        |
| Apodidae      | <i>Aerodramus fuciphagus</i>      | 0       | 0       | 1       | 1       | 0       | 1       | 0       | 0       | 0        | 0        | 0        | 0        |
| Apodidae      | <i>Cypsiurus balasiensis</i>      | 0       | 0       | 0       | 0       | 0       | 1       | 0       | 0       | 0        | 0        | 0        | 0        |
| Apodidae      | <i>Hirundapus caudacutus</i>      | 0       | 0       | 0       | 0       | 0       | 1       | 0       | 0       | 0        | 0        | 0        | 0        |
| Ardeidae      | <i>Ardea cinerea</i>              | 0       | 0       | 0       | 0       | 0       | 0       | 0       | 0       | 0        | 0        | 1        | 0        |
| Bucerotidae   | <i>Anthracoceros albirostris</i>  | 0       | 0       | 1       | 0       | 0       | 0       | 0       | 0       | 1        | 0        | 0        | 0        |
| Bucerotidae   | <i>Anthracoceros malayanus</i>    | 0       | 0       | 0       | 1       | 1       | 0       | 1       | 0       | 1        | 0        | 0        | 0        |
| Bucerotidae   | <i>Buceros rhinoceros</i>         | 1       | 0       | 0       | 1       | 0       | 0       | 0       | 0       | 1        | 0        | 0        | 0        |
| Bucerotidae   | <i>Rhinoplax vigil</i>            | 1       | 1       | 1       | 1       | 1       | 0       | 0       | 0       | 0        | 0        | 0        | 0        |
| Campephagidae | <i>Coracina striata</i>           | 1       | 0       | 0       | 0       | 0       | 0       | 0       | 0       | 0        | 0        | 0        | 0        |
| Campephagidae | <i>Hemipus hirundinaceus</i>      | 0       | 1       | 1       | 0       | 0       | 0       | 0       | 0       | 0        | 0        | 0        | 0        |
| Campephagidae | <i>Pericrocotus igneus</i>        | 0       | 0       | 0       | 0       | 1       | 0       | 0       | 0       | 0        | 0        | 0        | 0        |
| Campephagidae | <i>Pericrocotus spp.</i>          | 0       | 1       | 1       | 0       | 0       | 0       | 0       | 0       | 0        | 0        | 0        | 0        |
| Capitonidae   | <i>Calorhamphus fuliginosus</i>   | 0       | 0       | 0       | 0       | 0       | 0       | 0       | 0       | 1        | 0        | 0        | 0        |
| Capitonidae   | <i>Megalaima australis</i>        | 0       | 0       | 1       | 1       | 0       | 0       | 0       | 0       | 1        | 0        | 0        | 1        |
| Capitonidae   | <i>Megalaima rafflesi</i>         | 1       | 1       | 1       | 1       | 1       | 0       | 0       | 0       | 0        | 0        | 0        | 0        |
| Columbidae    | <i>Chalcophaps indica</i>         | 0       | 0       | 1       | 1       | 1       | 0       | 0       | 1       | 1        | 0        | 0        | 1        |
| Columbidae    | <i>Ducula aenea</i>               | 0       | 0       | 0       | 0       | 0       | 0       | 0       | 0       | 1        | 0        | 0        | 0        |
| Columbidae    | <i>Geopelia striata</i>           | 0       | 0       | 0       | 0       | 0       | 0       | 0       | 0       | 0        | 1        | 0        | 0        |
| Columbidae    | <i>Ptilinopus (jambu)</i>         | 0       | 0       | 0       | 0       | 0       | 0       | 0       | 0       | 0        | 0        | 0        | 1        |
| Columbidae    | <i>Streptopelia chinensis</i>     | 0       | 0       | 0       | 0       | 0       | 0       | 0       | 0       | 0        | 1        | 1        | 1        |
| Columbidae    | <i>Treron curvirostra</i>         | 0       | 0       | 0       | 0       | 0       | 0       | 0       | 0       | 0        | 1        | 1        | 0        |
| Columbidae    | <i>Treron vernans</i>             | 0       | 1       | 0       | 0       | 0       | 0       | 0       | 0       | 0        | 0        | 0        | 0        |
| Coraciidae    | <i>Eurystomus orientalis</i>      | 0       | 0       | 0       | 0       | 0       | 0       | 0       | 0       | 0        | 1        | 0        | 1        |
| Corvidae      | <i>Corvus enca</i>                | 0       | 1       | 0       | 0       | 0       | 1       | 1       | 1       | 1        | 0        | 0        | 0        |
| Corvidae      | <i>Platysmurus leucopterus</i>    | 0       | 0       | 0       | 0       | 0       | 0       | 0       | 1       | 1        | 0        | 0        | 0        |
| Cuculidae     | <i>Cacomantis merulinus</i>       | 0       | 0       | 0       | 0       | 0       | 1       | 1       | 0       | 0        | 1        | 1        | 1        |
| Cuculidae     | <i>Cacomantis sonneratii</i>      | 1       | 0       | 0       | 1       | 0       | 0       | 0       | 0       | 1        | 0        | 0        | 0        |
| Cuculidae     | <i>Centropus bengalensis</i>      | 0       | 0       | 0       | 0       | 0       | 1       | 1       | 1       | 1        | 1        | 1        | 1        |
| Cuculidae     | <i>Centropus sinensis</i>         | 0       | 0       | 0       | 0       | 1       | 0       | 0       | 0       | 0        | 0        | 0        | 0        |
| Cuculidae     | <i>Cuculus micropterus</i>        | 0       | 0       | 0       | 0       | 0       | 0       | 1       | 0       | 0        | 0        | 0        | 1        |
| Cuculidae     | <i>Cuculus saturatus</i>          | 0       | 0       | 0       | 1       | 1       | 0       | 0       | 0       | 0        | 0        | 0        | 0        |
| Cuculidae     | <i>Rhamphococcyx curvirostris</i> | 0       | 0       | 0       | 0       | 1       | 0       | 0       | 0       | 0        | 0        | 0        | 0        |
| Cuculidae     | <i>Rhopodytes sumatranus</i>      | 0       | 0       | 0       | 0       | 0       | 0       | 0       | 0       | 1        | 0        | 0        | 0        |
| Cuculidae     | <i>Surmiculus lugubris</i>        | 0       | 0       | 0       | 0       | 0       | 0       | 1       | 0       | 1        | 0        | 0        | 1        |
| Dicaeidae     | <i>Dicaeum spp.</i>               | 0       | 0       | 1       | 1       | 1       | 0       | 0       | 0       | 0        | 0        | 0        | 0        |
| Dicaeidae     | <i>Dicaeum trigonostigma</i>      | 1       | 1       | 1       | 1       | 1       | 0       | 0       | 0       | 1        | 0        | 0        | 1        |
| Dicaeidae     | <i>Prionochilus percussus</i>     | 0       | 0       | 0       | 0       | 0       | 0       | 0       | 1       | 1        | 0        | 0        | 0        |
| Dicruridae    | <i>Dicrurus aeneus</i>            | 0       | 0       | 1       | 0       | 1       | 0       | 0       | 0       | 0        | 0        | 0        | 0        |
| Dicruridae    | <i>Dicrurus paradiseus</i>        | 1       | 1       | 1       | 1       | 1       | 0       | 1       | 0       | 1        | 0        | 0        | 1        |
| Estrildidae   | <i>Lonchura leucogastra</i>       | 0       | 0       | 0       | 0       | 0       | 0       | 0       | 0       | 0        | 0        | 0        | 1        |
| Estrildidae   | <i>Lonchura maja</i>              | 0       | 0       | 0       | 0       | 0       | 0       | 0       | 0       | 0        | 1        | 1        | 1        |
| Estrildidae   | <i>Lonchura punctulata</i>        | 0       | 0       | 0       | 0       | 0       | 1       | 0       | 0       | 0        | 1        | 1        | 0        |
| Eurylaimidae  | <i>Corydon sumatranus</i>         | 0       | 0       | 1       | 0       | 0       | 0       | 0       | 0       | 0        | 0        | 0        | 0        |
| Eurylaimidae  | <i>Eurylaimus ochromalus</i>      | 0       | 0       | 1       | 1       | 1       | 0       | 1       | 1       | 1        | 0        | 0        | 0        |
| Falconidae    | <i>Microhierax fringillarius</i>  | 0       | 0       | 0       | 0       | 0       | 1       | 1       | 0       | 0        | 0        | 0        | 0        |
| Hemiprocnidae | <i>Hemiprocne comata</i>          | 0       | 1       | 1       | 1       | 1       | 0       | 0       | 0       | 0        | 0        | 0        | 0        |
| Hirundinidae  | <i>Hirundo rustica</i>            | 0       | 0       | 0       | 0       | 1       | 1       | 1       | 0       | 0        | 1        | 1        | 1        |
| Irenidae      | <i>Aegithina tiphia</i>           | 0       | 0       | 0       | 0       | 0       | 0       | 0       | 0       | 0        | 0        | 0        | 1        |
| Irenidae      | <i>Aegithina viridissima</i>      | 0       | 0       | 0       | 0       | 1       | 0       | 0       | 0       | 0        | 0        | 0        | 0        |
| Irenidae      | <i>Chloropsis cochinchinensis</i> | 0       | 0       | 1       | 0       | 0       | 0       | 0       | 0       | 0        | 0        | 0        | 0        |
| Irenidae      | <i>Chloropsis cyanopogon</i>      | 0       | 0       | 0       | 1       | 1       | 0       | 0       | 0       | 0        | 0        | 0        | 0        |
| Irenidae      | <i>Chloropsis sonnerati</i>       | 1       | 1       | 1       | 0       | 0       | 0       | 0       | 0       | 0        | 0        | 0        | 0        |
| Irenidae      | <i>Irena puella</i>               | 0       | 1       | 0       | 0       | 0       | 1       | 0       | 0       | 0        | 0        | 0        | 0        |
| Laniidae      | <i>Lanius tigrinus</i>            | 0       | 0       | 0       | 0       | 0       | 0       | 0       | 0       | 0        | 0        | 0        | 1        |
| Meropidae     | <i>Merops viridis</i>             | 0       | 1       | 0       | 1       | 1       | 1       | 1       | 1       | 1        | 1        | 1        | 1        |



| Family        | Species                         | Tr<br>1 | Tr<br>2 | Tr<br>3 | Tr<br>4 | Tr<br>5 | Tr<br>6 | Tr<br>7 | Tr<br>8 | Tr<br>10 | Tr<br>12 | Tr<br>13 | Tr<br>16 |
|---------------|---------------------------------|---------|---------|---------|---------|---------|---------|---------|---------|----------|----------|----------|----------|
| Meropidae     | <i>Nyctornis amictus</i>        | 0       | 0       | 0       | 0       | 1       | 0       | 0       | 0       | 0        | 0        | 0        | 0        |
| Monarchidae   | <i>Hypothymis azurea</i>        | 0       | 1       | 1       | 0       | 1       | 0       | 0       | 0       | 1        | 0        | 0        | 0        |
| Monarchidae   | <i>Philentoma pyrhopterum</i>   | 0       | 0       | 0       | 0       | 1       | 0       | 0       | 0       | 0        | 0        | 0        | 0        |
| Monarchidae   | <i>Rhipidura perlata</i>        | 0       | 0       | 0       | 1       | 1       | 0       | 0       | 0       | 0        | 0        | 0        | 0        |
| Monarchidae   | <i>Terpsiphone paradisi</i>     | 0       | 1       | 0       | 0       | 1       | 0       | 0       | 0       | 0        | 0        | 0        | 0        |
| Muscicapidae  | <i>Culicicapa ceylonensis</i>   | 1       | 0       | 0       | 0       | 0       | 0       | 0       | 0       | 0        | 0        | 0        | 0        |
| Muscicapidae  | <i>Cyornis tickelliae</i>       | 1       | 1       | 1       | 1       | 1       | 0       | 0       | 0       | 0        | 0        | 0        | 0        |
| Muscicapidae  | (Unidentified flycatcher)       | 0       | 0       | 0       | 0       | 1       | 0       | 0       | 0       | 0        | 0        | 0        | 0        |
| Nectariniidae | <i>Aethopyga siparaja</i>       | 0       | 0       | 1       | 1       | 1       | 0       | 0       | 0       | 0        | 0        | 0        | 0        |
| Nectariniidae | <i>Anthreptes malacensis</i>    | 1       | 0       | 0       | 1       | 1       | 0       | 1       | 0       | 1        | 0        | 0        | 1        |
| Nectariniidae | <i>Anthreptes simplex</i>       | 0       | 0       | 0       | 0       | 1       | 0       | 0       | 0       | 0        | 0        | 0        | 0        |
| Nectariniidae | <i>Arachnothera affinis</i>     | 1       | 1       | 1       | 0       | 1       | 0       | 0       | 0       | 0        | 0        | 0        | 0        |
| Nectariniidae | <i>Arachnothera longirostra</i> | 1       | 0       | 1       | 1       | 1       | 0       | 0       | 0       | 0        | 0        | 0        | 0        |
| Nectariniidae | <i>Hypogramma</i>               | 0       | 0       | 0       | 0       | 1       | 0       | 0       | 0       | 0        | 0        | 0        | 0        |
| Nectariniidae | <i>hypogrammicum</i>            | 0       | 0       | 0       | 0       | 0       | 0       | 1       | 1       | 0        | 0        | 0        | 0        |
| Oriolidae     | <i>Nectarinia jugularis</i>     | 0       | 0       | 0       | 1       | 1       | 0       | 0       | 0       | 1        | 0        | 0        | 0        |
| Orthonychidae | <i>Oriolus xanthonotus</i>      | 0       | 1       | 0       | 0       | 0       | 0       | 0       | 0       | 0        | 0        | 0        | 0        |
| Phasianidae   | <i>Eupetes macrocerus</i>       | 0       | 0       | 0       | 0       | 0       | 0       | 0       | 0       | 0        | 1        | 1        | 0        |
| Picidae       | <i>Gallus gallus</i>            | 0       | 0       | 0       | 1       | 0       | 0       | 0       | 0       | 0        | 0        | 0        | 0        |
| Picidae       | <i>Blythipicus rubiginosus</i>  | 0       | 0       | 0       | 0       | 0       | 0       | 0       | 0       | 0        | 0        | 1        | 0        |
| Picidae       | <i>Chrysocolaptes lucidus</i>   | 1       | 0       | 0       | 0       | 0       | 0       | 0       | 0       | 0        | 0        | 0        | 0        |
| Picidae       | <i>Dinopium rafflesii</i>       | 1       | 1       | 1       | 1       | 0       | 0       | 0       | 0       | 0        | 0        | 0        | 0        |
| Picidae       | <i>Dryocopus javensis</i>       | 0       | 0       | 1       | 0       | 1       | 0       | 0       | 0       | 0        | 0        | 0        | 0        |
| Picidae       | <i>Hemicircus concretus</i>     | 1       | 0       | 0       | 0       | 0       | 0       | 0       | 0       | 0        | 0        | 0        | 0        |
| Picidae       | <i>Meiglyptes tukki</i>         | 0       | 0       | 1       | 1       | 0       | 0       | 0       | 1       | 1        | 0        | 0        | 0        |
| Picidae       | <i>Picus puniceus</i>           | 0       | 0       | 0       | 0       | 0       | 0       | 0       | 0       | 1        | 0        | 0        | 0        |
| Psittacidae   | <i>Sasia abnormis</i>           | 1       | 1       | 1       | 1       | 1       | 1       | 0       | 1       | 0        | 0        | 0        | 0        |
| Psittacidae   | <i>Loriculus galgulus</i>       | 0       | 0       | 0       | 0       | 0       | 0       | 0       | 0       | 0        | 1        | 1        | 0        |
| Psittacidae   | <i>Psittacula longicauda</i>    | 1       | 1       | 1       | 1       | 1       | 1       | 0       | 1       | 0        | 0        | 0        | 0        |
| Pycnonotidae  | <i>Psittinus cyanurus</i>       | 1       | 1       | 1       | 0       | 1       | 0       | 0       | 0       | 0        | 0        | 0        | 0        |
| Pycnonotidae  | <i>Criniger phaeocephalus</i>   | 0       | 0       | 1       | 0       | 0       | 0       | 0       | 0       | 0        | 0        | 0        | 0        |
| Pycnonotidae  | <i>Hypsipetes criniger</i>      | 0       | 0       | 0       | 1       | 1       | 0       | 0       | 1       | 1        | 0        | 0        | 0        |
| Pycnonotidae  | <i>Pycnonotus atriceps</i>      | 0       | 0       | 0       | 0       | 0       | 0       | 0       | 0       | 0        | 1        | 1        | 0        |
| Pycnonotidae  | <i>Pycnonotus aurigaster</i>    | 0       | 0       | 1       | 1       | 1       | 1       | 1       | 1       | 1        | 0        | 0        | 1        |
| Pycnonotidae  | <i>Pycnonotus brunneus</i>      | 0       | 0       | 0       | 0       | 0       | 1       | 1       | 0       | 0        | 1        | 1        | 1        |
| Pycnonotidae  | <i>Pycnonotus goiavier</i>      | 0       | 0       | 0       | 0       | 0       | 0       | 0       | 1       | 1        | 0        | 0        | 0        |
| Pycnonotidae  | <i>Pycnonotus melanicterus</i>  | 0       | 0       | 0       | 1       | 0       | 1       | 0       | 0       | 1        | 0        | 0        | 0        |
| Pycnonotidae  | <i>Pycnonotus simplex</i>       | 1       | 1       | 0       | 1       | 0       | 0       | 0       | 0       | 0        | 0        | 0        | 0        |
| Rallidae      | <i>Pycnonotus spp.</i>          | 0       | 0       | 0       | 0       | 0       | 0       | 0       | 0       | 0        | 0        | 1        | 0        |
| Sturnidae     | <i>Amaurornis phoenicurus</i>   | 1       | 1       | 1       | 1       | 1       | 0       | 0       | 0       | 0        | 0        | 0        | 0        |
| Sturnidae     | <i>Aplonis panayensis</i>       | 0       | 1       | 1       | 0       | 1       | 1       | 1       | 1       | 0        | 0        | 1        | 1        |
| Sylviidae     | <i>Gracula religiosa</i>        | 0       | 0       | 0       | 0       | 0       | 0       | 0       | 0       | 1        | 0        | 0        | 0        |
| Sylviidae     | <i>Cettia vulcania</i>          | 0       | 0       | 0       | 0       | 0       | 0       | 0       | 0       | 0        | 1        | 0        | 1        |
| Sylviidae     | <i>Cisticola exilis</i>         | 0       | 0       | 0       | 0       | 0       | 0       | 0       | 0       | 0        | 1        | 1        | 0        |
| Sylviidae     | <i>Cisticola juncidis</i>       | 0       | 1       | 1       | 1       | 1       | 1       | 1       | 1       | 1        | 1        | 1        | 1        |
| Sylviidae     | <i>Orthotomus atrogularis</i>   | 1       | 1       | 1       | 1       | 1       | 1       | 1       | 0       | 0        | 1        | 1        | 1        |
| Sylviidae     | <i>Orthotomus ruficeps</i>      | 0       | 1       | 1       | 1       | 1       | 1       | 1       | 0       | 0        | 0        | 0        | 0        |
| Sylviidae     | <i>Orthotomus sericeus</i>      | 0       | 0       | 0       | 0       | 0       | 1       | 1       | 0       | 1        | 1        | 1        | 1        |
| Sylviidae     | <i>Prinia familiaris</i>        | 0       | 0       | 0       | 0       | 0       | 1       | 0       | 1       | 0        | 1        | 1        | 1        |
| Timaliidae    | <i>Prinia flaviventris</i>      | 0       | 0       | 0       | 0       | 1       | 0       | 0       | 0       | 0        | 0        | 0        | 0        |
| Timaliidae    | <i>Alcippe brunneicauda</i>     | 0       | 1       | 0       | 0       | 0       | 0       | 0       | 0       | 0        | 0        | 0        | 0        |
| Timaliidae    | <i>Kenopia striata</i>          | 0       | 0       | 0       | 1       | 0       | 1       | 1       | 0       | 1        | 1        | 1        | 1        |
| Timaliidae    | <i>Macronous gularis</i>        | 0       | 1       | 0       | 0       | 0       | 0       | 0       | 0       | 0        | 0        | 0        | 0        |
| Timaliidae    | <i>Malacopteron cinereum</i>    | 1       | 1       | 0       | 0       | 1       | 0       | 0       | 0       | 0        | 0        | 0        | 0        |
| Timaliidae    | <i>Malacopteron magnirostre</i> | 1       | 0       | 0       | 0       | 0       | 0       | 0       | 0       | 0        | 0        | 0        | 1        |
| Timaliidae    | <i>Malacopteron magnum</i>      | 0       | 0       | 0       | 0       | 1       | 0       | 0       | 0       | 0        | 0        | 0        | 0        |
| Timaliidae    | <i>Pellorneum capistratum</i>   | 0       | 0       | 0       | 0       | 1       | 0       | 0       | 1       | 0        | 0        | 0        | 0        |
| Timaliidae    | <i>Pomatorhinus montanus</i>    | 0       | 0       | 1       | 1       | 1       | 0       | 0       | 0       | 1        | 0        | 0        | 0        |
| Timaliidae    | <i>Stachyris erythroptera</i>   | 0       | 0       | 0       | 1       | 0       | 0       | 0       | 0       | 0        | 0        | 0        | 1        |
| Timaliidae    | <i>Stachyris maculata</i>       | 0       | 0       | 1       | 0       | 0       | 0       | 0       | 0       | 0        | 0        | 0        | 0        |
| Timaliidae    | <i>Stachyris nigricollis</i>    | 1       | 1       | 0       | 0       | 0       | 0       | 1       | 0       | 0        | 0        | 0        | 0        |
| Timaliidae    | <i>Stachyris sp.</i>            | 0       | 1       | 0       | 0       | 0       | 0       | 0       | 0       | 0        | 0        | 0        | 0        |

| Family       | Species                       | Tr<br>1 | Tr<br>2 | Tr<br>3 | Tr<br>4 | Tr<br>5 | Tr<br>6 | Tr<br>7 | Tr<br>8 | Tr<br>10 | Tr<br>12 | Tr<br>13 | Tr<br>16 |
|--------------|-------------------------------|---------|---------|---------|---------|---------|---------|---------|---------|----------|----------|----------|----------|
| Timaliidae   | <i>Trichastoma abbotti</i>    | 0       | 0       | 0       | 0       | 1       | 0       | 0       | 0       | 0        | 0        | 0        | 0        |
| Timaliidae   | <i>Trichastoma bicolor</i>    | 0       | 0       | 1       | 0       | 0       | 0       | 0       | 0       | 1        | 0        | 0        | 0        |
| Timaliidae   | <i>Trichastoma malaccense</i> | 1       | 1       | 0       | 0       | 0       | 0       | 0       | 0       | 0        | 0        | 0        | 0        |
| Trogonidae   | <i>Trichastoma sepiarium</i>  | 1       | 1       | 0       | 0       | 1       | 0       | 0       | 0       | 0        | 0        | 0        | 0        |
| Trogonidae   | <i>Harpactes kasumba</i>      | 0       | 0       | 0       | 1       | 0       | 0       | 0       | 0       | 0        | 0        | 0        | 0        |
| Turdidae     | <i>Harpactes oreskios</i>     | 0       | 1       | 0       | 1       | 0       | 1       | 0       | 0       | 0        | 0        | 0        | 0        |
| Turdidae     | <i>Copsychus malabaricus</i>  | 0       | 0       | 0       | 0       | 0       | 1       | 1       | 0       | 0        | 1        | 1        | 1        |
| Turdidae     | <i>Copsychus saularis</i>     | 0       | 0       | 0       | 0       | 0       | 1       | 1       | 0       | 0        | 0        | 0        | 0        |
| Turnicidae   | <i>Turdus obscurus</i>        | 0       | 0       | 0       | 0       | 0       | 0       | 0       | 0       | 0        | 1        | 1        | 1        |
| Zosteropidae | <i>Turnix suscitator</i>      | 0       | 0       | 1       | 0       | 1       | 0       | 0       | 0       | 0        | 0        | 0        | 0        |
| Species A    | <i>Zosterops palpebrosus</i>  | 1       | 0       | 0       | 0       | 0       | 0       | 0       | 0       | 0        | 0        | 0        | 0        |
| Species B    | -                             | 1       | 0       | 0       | 0       | 0       | 0       | 0       | 0       | 0        | 0        | 0        | 0        |
| Species C    | -                             | 0       | 1       | 0       | 0       | 0       | 0       | 0       | 0       | 0        | 0        | 0        | 0        |
| Species D    | -                             | 0       | 1       | 0       | 0       | 0       | 0       | 0       | 0       | 0        | 0        | 0        | 0        |
| Species E    | -                             | 0       | 1       | 0       | 0       | 0       | 0       | 0       | 0       | 0        | 0        | 0        | 0        |
| Species F    | -                             | 0       | 1       | 0       | 0       | 0       | 0       | 0       | 0       | 0        | 0        | 0        | 0        |
| Species G    | -                             | 0       | 1       | 0       | 0       | 0       | 0       | 0       | 0       | 0        | 0        | 0        | 0        |
| Species H    | -                             | 0       | 0       | 1       | 0       | 0       | 0       | 0       | 0       | 0        | 0        | 0        | 0        |
| Species I    | -                             | 0       | 0       | 1       | 1       | 0       | 0       | 0       | 0       | 0        | 0        | 0        | 0        |
| Species J    | -                             | 0       | 0       | 0       | 0       | 1       | 0       | 0       | 0       | 0        | 0        | 0        | 0        |
| -            | -                             |         |         |         |         |         |         |         |         |          |          |          |          |

\* Source P. Jepson, Djawardi

**Table S11. Invertebrate fauna (termites) recorded in Mato Grosso according to taxa, feeding group and transect\***

| Family<br>(subfamily)         | Species                                   | Feeding<br>group | Tr<br>2 | Tr<br>3 | Tr<br>4 | Tr<br>5 | Tr<br>6 | Tr<br>18 | Tr<br>19 | Tr<br>23 | Tr<br>24 | Tr<br>25 | Tr<br>26 |
|-------------------------------|-------------------------------------------|------------------|---------|---------|---------|---------|---------|----------|----------|----------|----------|----------|----------|
| <b>Rhinotermitidae</b>        | <i>Coptotermes testaceus</i>              | X                | 0       | 0       | 0       | 0       | 0       | 0        | 0        | 1        | 0        | 0        | 1        |
|                               | <i>Dolichorhinotermes longilabius</i>     | X                | 0       | 0       | 0       | 2       | 0       | 0        | 1        | 2        | 0        | 0        | 0        |
|                               | <i>Heterotermes tenuis</i>                | X                | 1       | 0       | 0       | 2       | 0       | 2        | 0        | 0        | 1        | 0        | 0        |
|                               | <i>Rhinotermes marginalis</i>             | X                | 0       | 0       | 0       | 1       | 0       | 0        | 0        | 0        | 0        | 0        | 2        |
|                               |                                           |                  |         |         |         |         |         |          |          |          |          |          |          |
| <b>Termitidae</b>             |                                           |                  |         |         |         |         |         |          |          |          |          |          |          |
| Apicotermitinae:              | <i>Anoplotermes banksi</i>                | H                | 0       | 0       | 0       | 0       | 1       | 0        | 0        | 0        | 0        | 0        | 0        |
| ( <i>Anoplotermes</i> -group) | <i>Anoplotermes</i> sp. A                 | H                | 1       | 0       | 0       | 2       | 1       | 0        | 1        | 5        | 0        | 1        | 3        |
|                               | <i>Anoplotermes</i> sp. B                 | H                | 0       | 0       | 0       | 0       | 0       | 0        | 0        | 0        | 1        | 1        | 2        |
|                               | <i>Anoplotermes</i> sp. C                 | H                | 2       | 0       | 0       | 0       | 0       | 0        | 0        | 1        | 1        | 0        | 0        |
|                               | <i>Anoplotermes</i> sp. D                 | H                | 0       | 0       | 0       | 0       | 0       | 0        | 0        | 0        | 0        | 1        | 1        |
|                               | <i>Anoplotermes</i> sp. E                 | H                | 0       | 0       | 0       | 0       | 1       | 0        | 0        | 0        | 0        | 0        | 0        |
|                               | <i>Grigiotermes</i> sp. A                 | H                | 0       | 0       | 0       | 0       | 0       | 0        | 0        | 2        | 0        | 0        | 2        |
|                               | <i>Ruptitermes reconditus</i>             | L                | 0       | 0       | 0       | 0       | 0       | 0        | 0        | 0        | 0        | 0        | 1        |
|                               | <i>Ruptitermes</i> sp. A                  | L                | 0       | 0       | 0       | 0       | 0       | 0        | 0        | 1        | 0        | 0        | 0        |
|                               | <i>Ruptitermes</i> sp. B                  | L                | 0       | 0       | 0       | 0       | 0       | 0        | 1        | 1        | 0        | 0        | 0        |
|                               | <i>Tetimatermes</i> sp. A                 | H                | 0       | 0       | 0       | 0       | 0       | 0        | 1        | 0        | 0        | 0        | 0        |
| (Termitinae)                  | <i>Cavitermes parvicavus</i>              | H                | 0       | 0       | 0       | 0       | 1       | 0        | 0        | 0        | 0        | 0        | 0        |
|                               | <i>Cavitermes tuberosus</i>               | H                | 0       | 0       | 0       | 0       | 1       | 0        | 0        | 0        | 0        | 0        | 0        |
|                               | <i>Cornicapritermes mucronatus</i>        | X                | 0       | 0       | 0       | 0       | 0       | 0        | 0        | 1        | 0        | 0        | 0        |
|                               | <i>Crepititermes verruculosus</i>         | H                | 0       | 0       | 0       | 1       | 1       | 0        | 0        | 0        | 1        | 1        | 0        |
|                               | <i>Cylindrotermes flangiatus</i>          | X                | 0       | 0       | 0       | 4       | 0       | 1        | 0        | 0        | 0        | 1        | 0        |
|                               | <i>Dentispicotermes globicephalus</i>     | H                | 0       | 0       | 0       | 0       | 0       | 0        | 1        | 0        | 0        | 0        | 0        |
|                               | <i>Dentispicotermes</i> sp. A             | H                | 0       | 0       | 0       | 0       | 0       | 0        | 0        | 0        | 0        | 1        | 0        |
|                               | <i>Microcerotermes strunckii</i>          | X                | 1       | 0       | 0       | 0       | 0       | 0        | 0        | 1        | 0        | 0        | 0        |
|                               | <i>Neocapritermes opacus</i>              | I                | 0       | 0       | 0       | 0       | 0       | 0        | 0        | 0        | 1        | 0        | 0        |
|                               | <i>Neocapritermes unicornis</i>           | I                | 0       | 0       | 0       | 0       | 2       | 0        | 0        | 0        | 0        | 0        | 0        |
|                               | <i>Planicapritermes planiceps</i>         | X                | 0       | 0       | 0       | 2       | 0       | 0        | 0        | 0        | 0        | 0        | 0        |
|                               | <i>Spinitermes nigrostomus</i>            | I                | 0       | 0       | 0       | 0       | 0       | 0        | 0        | 0        | 0        | 1        | 0        |
|                               | <i>Termes medioculatus</i>                | I                | 0       | 0       | 1       | 0       | 2       | 0        | 0        | 1        | 0        | 0        | 0        |
| (Nasutitermitinae)            | <i>Anhangatermes macarthuri</i>           | H                | 0       | 0       | 0       | 0       | 0       | 0        | 1        | 0        | 0        | 0        | 0        |
|                               | <i>Atlantitermes raripilus</i>            | H                | 0       | 0       | 0       | 0       | 0       | 0        | 0        | 1        | 0        | 1        | 0        |
|                               | <i>Atlantitermes snyderi</i>              | H                | 0       | 0       | 0       | 0       | 0       | 0        | 1        | 0        | 0        | 0        | 0        |
|                               | <i>Atlantitermes stercophilus</i>         | H                | 0       | 0       | 0       | 0       | 1       | 0        | 0        | 0        | 0        | 0        | 0        |
|                               | <i>Atlantitermes</i> sp. A                | H                | 0       | 0       | 0       | 0       | 1       | 0        | 0        | 0        | 0        | 0        | 0        |
|                               | <i>Coatitermes clevelandi</i>             | H                | 0       | 0       | 0       | 0       | 1       | 0        | 0        | 0        | 0        | 1        | 0        |
|                               | <i>Coatitermes</i> sp. A                  | H                | 0       | 0       | 0       | 0       | 1       | 0        | 0        | 0        | 0        | 0        | 0        |
|                               | <i>Diversitermes diversimiles</i>         | L                | 0       | 0       | 0       | 0       | 0       | 0        | 0        | 0        | 0        | 1        | 1        |
|                               | <i>Nasutitermes brevipilus</i>            | I                | 0       | 0       | 0       | 0       | 1       | 0        | 0        | 0        | 0        | 0        | 0        |
|                               | <i>Nasutitermes corniger</i>              | X                | 2       | 0       | 0       | 0       | 0       | 0        | 0        | 0        | 0        | 2        | 1        |
|                               | <i>Nasutitermes coxipoensis</i>           | L                | 0       | 4       | 1       | 0       | 0       | 0        | 0        | 0        | 0        | 0        | 0        |
|                               | <i>Nasutitermes ephratae</i>              | X                | 0       | 0       | 0       | 0       | 0       | 0        | 0        | 0        | 1        | 0        | 1        |
|                               | <i>Nasutitermes major</i>                 | X                | 0       | 0       | 0       | 5       | 0       | 0        | 0        | 0        | 0        | 0        | 0        |
|                               | <i>Nasutitermes octopilis</i>             | X                | 0       | 0       | 0       | 1       | 0       | 0        | 0        | 0        | 0        | 0        | 0        |
|                               | <i>Nasutitermes similis</i>               | X                | 0       | 0       | 0       | 2       | 0       | 3        | 3        | 0        | 1        | 0        | 2        |
|                               | <i>Nasutitermes surinamensis</i>          | X                | 0       | 0       | 0       | 0       | 0       | 1        | 0        | 0        | 1        | 0        | 0        |
|                               | <i>Nasutitermes wheeleri*</i>             | X                | 0       | 0       | 0       | 0       | 0       | 0        | 0        | 0        | 0        | 0        | 0        |
|                               | <i>Nasutitermes</i> sp. A                 | X                | 0       | 0       | 0       | 0       | 0       | 2        | 0        | 0        | 0        | 1        | 0        |
|                               | <i>Nasutitermes</i> sp. B                 | X                | 0       | 0       | 0       | 2       | 0       | 0        | 0        | 0        | 0        | 0        | 0        |
|                               | <i>Nasutitermes</i> sp. C                 | X                | 0       | 0       | 2       | 0       | 0       | 0        | 0        | 0        | 0        | 0        | 0        |
|                               | <i>Subulitermes microsoma</i>             | H                | 0       | 0       | 0       | 0       | 0       | 0        | 4        | 0        | 0        | 2        | 0        |
|                               | <i>Triangularitermes triangulariceps</i>  | I                | 0       | 0       | 0       | 0       | 1       | 0        | 0        | 0        | 0        | 0        | 0        |
|                               | <i>Velocitermes</i> sp. A                 | L                | 0       | 0       | 0       | 1       | 0       | 0        | 0        | 2        | 0        | 0        | 0        |
| (Syntermitinae)               | <i>Cornitermes bequaerti</i>              | I                | 1       | 0       | 0       | 0       | 0       | 2        | 0        | 1        | 1        | 3        | 0        |
|                               | <i>Cornitermes pugnax</i>                 | I                | 0       | 0       | 0       | 1       | 0       | 0        | 0        | 0        | 1        | 0        | 0        |
|                               | <i>Cornitermes</i> sp. D                  | I                | 0       | 0       | 0       | 0       | 0       | 0        | 0        | 0        | 0        | 0        | 1        |
|                               | <i>Curvitermes odontognathus</i>          | H                | 0       | 0       | 0       | 0       | 0       | 0        | 1        | 0        | 0        | 1        | 0        |
|                               | <i>Embirationes latidens</i>              | I                | 0       | 0       | 0       | 0       | 0       | 0        | 1        | 0        | 0        | 0        | 0        |
|                               | <i>Embirationes neotenicus</i>            | I                | 1       | 0       | 0       | 0       | 1       | 0        | 0        | 1        | 0        | 0        | 2        |
|                               | <i>Embirationes</i> cf. <i>silvestrii</i> | I                | 0       | 0       | 0       | 0       | 0       | 0        | 1        | 0        | 0        | 0        | 0        |
|                               | <i>Labiatermes labralis</i>               | H                | 0       | 0       | 0       | 0       | 1       | 0        | 0        | 0        | 0        | 0        | 1        |

|                                  |   |          |          |          |           |           |           |           |           |           |           |           |
|----------------------------------|---|----------|----------|----------|-----------|-----------|-----------|-----------|-----------|-----------|-----------|-----------|
| <i>Labiotermes pelliceus</i>     | H | 0        | 0        | 0        | 0         | 0         | 0         | 1         | 0         | 0         | 1         | 0         |
| <i>Labiotermes orthocephalus</i> | H | 0        | 0        | 0        | 0         | 0         | 0         | 1         | 0         | 0         | 0         | 0         |
| <i>Mapinguaritermes peruanus</i> | I | 0        | 0        | 0        | 0         | 0         | 0         | 0         | 0         | 0         | 0         | 1         |
| <i>Silvestritermes holmgreni</i> | I | 0        | 0        | 0        | 0         | 2         | 1         | 0         | 0         | 1         | 0         | 1         |
| <b>Species richness</b>          |   | <b>7</b> | <b>1</b> | <b>3</b> | <b>13</b> | <b>17</b> | <b>7</b>  | <b>14</b> | <b>14</b> | <b>11</b> | <b>16</b> | <b>16</b> |
| <b>Abundance</b>                 |   | <b>9</b> | <b>4</b> | <b>4</b> | <b>26</b> | <b>20</b> | <b>12</b> | <b>19</b> | <b>21</b> | <b>11</b> | <b>20</b> | <b>23</b> |

\* Source: R. Constantino. Feeding groups: H= humus; X= wood; L= leaf-litter; I= intermediate; E = epiphyte; abundance = number of colonies per species. Site numbers: top line = original MT listing; lower line =site number used in this study.

**Table S12. Invertebrate fauna (termites) recorded in Jambi, Sumatra according to taxa, feeding group and transect\***

| Family<br>(subfamily)   | Species                                      | Feeding<br>group | Tr<br>1    | Tr<br>3   | Tr<br>6   | Tr<br>8   | Tr<br>10  | Tr<br>12 | Tr<br>14 |
|-------------------------|----------------------------------------------|------------------|------------|-----------|-----------|-----------|-----------|----------|----------|
| <b>Kalotermitidae</b>   | <i>Glyptotermes</i> sp.                      | X                | 0          | 0         | 0         | 1         | 0         | 0        | 0        |
| <b>Rhinotermitidae</b>  | <i>Coptotermes curvignathus</i>              | X                | 1          | 1         | 1         | 3         | 1         | 0        | 0        |
|                         | <i>Coptotermes sepangensis</i>               | X                | 0          | 0         | 4         | 0         | 0         | 0        | 0        |
|                         | <i>Coptotermes borneensis</i>                | X                | 0          | 0         | 1         | 0         | 0         | 0        | 0        |
|                         | <i>Heterotermes tenuior</i>                  | X                | 1          | 0         | 0         | 0         | 0         | 0        | 0        |
|                         | <i>Parrhinotermes</i> near <i>minor</i>      | X                | 0          | 0         | 0         | 0         | 1         | 0        | 0        |
|                         | <i>Parrhinotermes</i> near sp. C             | X                | 0          | 1         | 0         | 0         | 0         | 0        | 0        |
|                         | <i>Schedorhinotermes sarawakensis</i>        | X                | 1          | 0         | 9         | 0         | 0         | 0        | 0        |
|                         | <i>Schedorhinotermes medioobscurus</i>       | X                | 7          | 7         | 7         | 3         | 10        | 0        | 0        |
| <b>Termitidae</b>       | <i>Ancistrotermes pakstanicus</i>            | X                | 0          | 0         | 0         | 0         | 3         | 0        | 0        |
| (Macrotermitinae)       | <i>Macrotermes gilvus</i>                    | X                | 0          | 0         | 0         | 0         | 0         | 0        | 1        |
|                         | <i>Macrotermes ahmadi</i>                    | X                | 1          | 0         | 0         | 0         | 0         | 0        | 0        |
|                         | <i>Odontotermes denticulatus</i>             | X                | 0          | 0         | 0         | 0         | 5         | 0        | 0        |
|                         | <i>Odontotermes sarawakensis</i>             | X                | 10         | 9         | 0         | 0         | 0         | 0        | 0        |
| (Termitinae)            | <i>Coxocapritermes</i> sp. A                 | H                | 6          | 1         | 0         | 0         | 0         | 0        | 0        |
|                         | <i>Coxocapritermes</i> sp. C                 | H                | 2          | 3         | 0         | 0         | 0         | 0        | 0        |
|                         | <i>Coxocapritermes</i> sp. D                 | H                | 1          | 3         | 0         | 0         | 2         | 0        | 0        |
|                         | <i>Dicuspiditermes nemorosus</i>             | H                | 11         | 18        | 0         | 12        | 12        | 0        | 0        |
|                         | <i>Dicuspiditermes santschii</i>             | H                | 6          | 5         | 2         | 2         | 1         | 0        | 0        |
|                         | <i>Globitermes globosus</i>                  | X                | 8          | 4         | 0         | 0         | 1         | 4        | 0        |
|                         | <i>Homalotermes eleanorae</i>                | I                | 1          | 0         | 0         | 3         | 0         | 0        | 0        |
|                         | <i>Homalotermes foraminifer</i>              | I                | 1          | 4         | 0         | 0         | 0         | 0        | 0        |
|                         | <i>Kemmeritermes sarawakensis</i>            | H                | 4          | 1         | 0         | 0         | 0         | 0        | 0        |
|                         | <i>Labritermes buttelreepeni</i>             | H                | 0          | 0         | 0         | 2         | 1         | 0        | 0        |
|                         | <i>Malaysiocapritermes prosetiger</i>        | H                | 0          | 2         | 0         | 0         | 10        | 0        | 0        |
|                         | <i>Microcerotermes</i> near <i>havilandi</i> | X                | 0          | 1         | 0         | 0         | 0         | 0        | 0        |
|                         | <i>Microcerotermes serrula</i>               | X                | 3          | 7         | 0         | 1         | 0         | 0        | 0        |
|                         | <i>Mirocapritermes connectans</i>            | H                | 0          | 2         | 0         | 0         | 10        | 0        | 0        |
|                         | <i>Pericapritermes dolichocephalus</i>       | H                | 0          | 0         | 0         | 0         | 6         | 0        | 0        |
|                         | <i>Pericapritermes nitobei</i>               | H                | 1          | 0         | 0         | 0         | 2         | 0        | 0        |
|                         | <i>Pericapritermes semarangi</i>             | H                | 2          | 0         | 0         | 0         | 0         | 5        | 0        |
|                         | <i>Procapritermes</i> near <i>minutus</i>    | H                | 4          | 0         | 0         | 0         | 1         | 0        | 0        |
|                         | <i>Procapritermes neosetiger</i>             | H                | 0          | 0         | 0         | 1         | 0         | 0        | 0        |
|                         | <i>Procapritermes sandakanensis</i>          | H                | 0          | 0         | 0         | 0         | 3         | 0        | 0        |
|                         | <i>Procapritermes setiger</i>                | H                | 8          | 6         | 0         | 0         | 2         | 0        | 0        |
|                         | <i>Procapritermes</i> sp. A                  | H                | 0          | 0         | 0         | 0         | 5         | 0        | 0        |
|                         | <i>Prohamitermes mirabilis</i>               | I                | 3          | 7         | 4         | 6         | 0         | 0        | 0        |
|                         | <i>Termes comis</i>                          | I                | 4          | 1         | 1         | 0         | 0         | 0        | 0        |
|                         | <i>Termes propinquus</i>                     | I                | 3          | 0         | 1         | 12        | 0         | 0        | 0        |
| (Nasutitermitinae)      | <i>Bulbitermes germanus</i>                  | X                | 2          | 0         | 0         | 0         | 0         | 0        | 0        |
|                         | <i>Bulbitermes prabhae</i>                   | X                | 1          | 0         | 0         | 0         | 0         | 0        | 0        |
|                         | <i>Bulbitermes</i> sp. A                     | X                | 3          | 1         | 0         | 0         | 0         | 0        | 0        |
|                         | <i>Havilanditermes proatripennis</i>         | X                | 0          | 0         | 0         | 6         | 0         | 0        | 0        |
|                         | <i>Hospitalitermes hospitalis</i>            | E                | 4          | 0         | 0         | 2         | 0         | 0        | 0        |
|                         | <i>Leucopitermes</i> sp. A                   | H                | 1          | 0         | 0         | 0         | 0         | 0        | 0        |
|                         | <i>Malaysiotermes malayanus</i>              | H                | 1          | 3         | 0         | 0         | 0         | 0        | 0        |
|                         | <i>Malaysiotermes</i> sp. B                  | H                | 2          | 3         | 0         | 0         | 0         | 0        | 0        |
|                         | <i>Nasutitermes havilandi</i>                | X                | 1          | 0         | 3         | 0         | 2         | 0        | 0        |
|                         | <i>Nasutitermes matangensis</i>              | X                | 0          | 0         | 0         | 0         | 2         | 0        | 0        |
|                         | <i>Nasutitermes neoparvus</i>                | X                | 0          | 0         | 0         | 1         | 0         | 0        | 0        |
|                         | <i>Nasutitermes</i> sp. C                    | X                | 0          | 0         | 0         | 2         | 0         | 0        | 0        |
|                         | <i>Nasutitermes</i> sp. D                    | X                | 1          | 0         | 2         | 0         | 0         | 0        | 0        |
|                         | <i>Oriensubulitermes inanis</i>              | H                | 2          | 4         | 0         | 0         | 2         | 0        | 0        |
| <b>Species richness</b> |                                              |                  | <b>34</b>  | <b>23</b> | <b>11</b> | <b>15</b> | <b>21</b> | <b>2</b> | <b>1</b> |
| <b>Abundance</b>        |                                              |                  | <b>110</b> | <b>94</b> | <b>35</b> | <b>62</b> | <b>82</b> | <b>9</b> | <b>1</b> |

\* Source: Jones et al. (2003). Feeding groups: H = humus; X = wood; I = intermediate; E = epiphyte. Abundance = No. colonies per species.

**Table S13. Target groups and significant indicators occurring in at least one region (excluding PFEs for fauna)**

| Target group             | Indicator                  | Brazil        |          | Sumatra  |          |        |
|--------------------------|----------------------------|---------------|----------|----------|----------|--------|
|                          |                            | <i>r</i>      | <i>P</i> | <i>r</i> | <i>P</i> |        |
| Plant species            | PFT diversity              | 0.956         | 0.0001   | 0.900    | 0.0001   |        |
|                          | Bryophyte cover/abundance  | 0.642         | 0.0001   | 0.716    | 0.002    |        |
|                          | Woody plants < 2m tall c/a | 0.688         | 0.0001   | 0.614    | 0.011    |        |
|                          | Mean canopy height         | 0.558         | 0.001    | 0.894    | 0.0001   |        |
|                          | Basal area woody plants    | 0.499         | 0.004    | 0.925    | 0.0001   |        |
|                          | Litter depth               | 0.359         | 0.043    | 0.674    | 0.004    |        |
|                          | .....                      |               |          |          |          |        |
|                          | <b>PFT-weighted PFEs</b>   |               |          |          |          |        |
|                          | Dorsiventral ls. (do)      | 0.958         | 0.0001   | 0.900    | 0.0001   |        |
|                          | Mesophyll (me)             | 0.818         | 0.0001   | 0.837    | 0.0001   |        |
|                          | Phanerophyte (ph)          | 0.816         | 0.0001   | 0.954    | 0.0001   |        |
|                          | Lateral incl. ls.(la)      | 0.789         | 0.0001   | 0.921    | 0.0001   |        |
|                          | Platyphyll (pl)            | 0.721         | 0.0001   | 0.840    | 0.0001   |        |
|                          | Green p/s stem (ct)        | 0.687         | 0.0001   | 0.908    | 0.0001   |        |
|                          | Composite incl. ls. (co)   | 0.507         | 0.003    | 0.838    | 0.0001   |        |
|                          | Succulent (su)             | 0.488         | 0.005    | 0.826    | 0.0001   |        |
|                          | Rosulate ls.(ro)           | 0.463         | 0.008    | 0.833    | 0.0001   |        |
|                          | Lianoid life form (li)     | 0.822         | 0.0001   | 0.744    | 0.001    |        |
|                          | Graminoid (pv)             | 0.578         | 0.001    | 0.734    | 0.001    |        |
| Notophyll (no)           | 0.815                      | 0.0001        | 0.712    | 0.002    |          |        |
| Epiphyte (ep)            | 0.465                      | 0.007         | 0.707    | 0.002    |          |        |
| Adventitious roots (ad)  | 0.722                      | 0.0001        | 0.593    | 0.015    |          |        |
| Microphyll (mi)          | 0.399                      | 0.024         | 0.503    | 0.047    |          |        |
| Hemicryptophyte (hc)     | 0.668                      | 0.0001        | 0.500    | 0.048    |          |        |
| Filicoid ls. (fi)        | 0.788                      | 0.0001        | -0.300   | *        |          |        |
| Chamaephyte (ch)         | 0.517                      | 0.002         | -0.166   | *        |          |        |
| Bird species             | Litter depth               | -0.695        | 0.003    | 0.619    | 0.032    |        |
|                          | Spp.:PFTs ratio            | -0.173        | *        | 0.771    | 0.003    |        |
|                          | Mean canopy height         | 0.449         | *        | 0.721    | 0.008    |        |
|                          | Basal area woody plants    | 0.161         | *        | 0.646    | 0.023    |        |
|                          | Plant species              | 0.031         | *        | 0.625    | 0.030    |        |
|                          | Crown cover non woody plts | -0.101        | *        | -0.634   | 0.027    |        |
|                          | .....                      |               |          |          |          |        |
|                          | Termite abundance          | -0.898        | 0.001    | 0.623    | *        |        |
|                          | Termite species            | -0.885        | 0.001    | 0.535    | *        |        |
|                          | Mammal species             | PFT diversity | 0.293    | *        | 0.847    | 0.0001 |
| Plant species            |                            | 0.262         | *        | 0.782    | 0.001    |        |
| Crown cover woody plants |                            | 0.256         | *        | 0.734    | 0.002    |        |
| Basal area woody plants  |                            | 0.613         | 0.012    | 0.617    | 0.014    |        |
| Mean canopy height       |                            | 0.597         | 0.015    | 0.615    | 0.015    |        |

| Target group      | Indicator                 | Brazil   |          | Sumatra  |          |
|-------------------|---------------------------|----------|----------|----------|----------|
|                   |                           | <i>r</i> | <i>P</i> | <i>r</i> | <i>P</i> |
| Termite species   | Spp.:PFTs ratio           | -0.112   | *        | 0.606    | 0.017    |
|                   | Bryophyte cover/abundance | 0.608    | 0.012    | 0.378    | *        |
|                   | Spp.:PFTs ratio           | 0.441    | *        | 0.970    | 0.0001   |
|                   | Basal area woody plants   | 0.614    | 0.045    | 0.966    | 0.001    |
|                   | Mean canopy height        | 0.356    | *        | 0.963    | 0.001    |
|                   | Litter depth              | 0.710    | 0.014    | 0.847    | 0.013    |
| Termite abundance | Plant species             | 0.496    | *        | 0.853    | 0.015    |
|                   | Mean furcation index      | -0.720   | 0.012    | -0.453   | *        |
|                   | Spp.:PFTs ratio           | 0.586    | *        | 0.977    | 0.0001   |
|                   | Basal area woody plants   | 0.548    | *        | 0.949    | 0.001    |
|                   | Mean canopy height        | 0.260    | *        | 0.929    | 0.003    |
|                   | Litter depth              | 0.718    | 0.013    | 0.907    | 0.005    |
|                   | Plant species             | 0.620    | 0.042    | 0.847    | 0.016    |
|                   | Mean furcation index      | -0.671   | 0.024    | -0.483   | *        |

# Ranked in order of regional statistical significance; \* ( $P > 0.05$ ); ‘species’ indicates species richness or diversity (number of species recorded per sample). See Table S1 for PFE coding.

**Table S14. Significant PFE indicators common to both regions**

| Target group      | Indicator                   | Brazil   |          | Sumatra  |          |
|-------------------|-----------------------------|----------|----------|----------|----------|
|                   |                             | <i>r</i> | <i>P</i> | <i>r</i> | <i>P</i> |
| Plant species     | Dorsiventral ls. (do) †     | 0.958    | 0.0001   | 0.900    | 0.0001   |
|                   | Mesophyll (me) †            | 0.818    | 0.0001   | 0.837    | 0.0001   |
|                   | Phanerophyte (ph) †         | 0.816    | 0.0001   | 0.954    | 0.0001   |
|                   | Lateral incl. ls.(la) †     | 0.789    | 0.0001   | 0.921    | 0.0001   |
|                   | Platyphyll (pl) †           | 0.721    | 0.0001   | 0.840    | 0.0001   |
|                   | Green p/s stem (ct) †       | 0.687    | 0.0001   | 0.908    | 0.0001   |
|                   | Composite incl. ls. (co) †  | 0.507    | 0.003    | 0.838    | 0.0001   |
|                   | Succulent (su) †            | 0.488    | 0.005    | 0.826    | 0.0001   |
|                   | Rosulate ls.(ro) †          | 0.463    | 0.008    | 0.833    | 0.0001   |
|                   | Lianoid life form (li) †    | 0.822    | 0.0001   | 0.744    | 0.001    |
|                   | Graminoid (pv) †            | 0.578    | 0.001    | 0.734    | 0.001    |
|                   | Notophyll (no) †            | 0.815    | 0.0001   | 0.712    | 0.002    |
|                   | Epiphyte (ep) †             | 0.465    | 0.007    | 0.707    | 0.002    |
|                   | Adventitious roots (ad) †   | 0.722    | 0.0001   | 0.593    | 0.015    |
|                   | Microphyll (mi) †           | 0.399    | 0.024    | 0.503    | 0.047    |
|                   | Hemicryptophyte (hc) †      | 0.668    | 0.0001   | 0.500    | 0.048    |
| Mammal species    | Succulent leaves (su)*      | 0.491    | 0.053    | 0.784    | 0.001    |
|                   | Filicoid leaves (fi)*       | 0.625    | 0.010    | 0.569    | 0.027    |
|                   | Filicoid leaves (fi) †      | 0.621    | 0.010    | 0.564    | 0.029    |
|                   | Lateral incl. leaves (la) † | 0.517    | 0.040    | 0.898    | 0.0001   |
|                   | Adventitious roots (ad) †   | 0.616    | 0.011    | 0.537    | 0.039    |
| Termite species   | Lateral incl. leaves (la)*  | 0.669    | 0.024    | 0.838    | 0.019    |
| Termite abundance | Lateral incl. leaves (la)*  | 0.721    | 0.012    | 0.839    | 0.018    |
|                   | Lateral incl. leaves (la) † | 0.606    | 0.048    | 0.763    | 0.046    |
|                   | Dorsiventral leaves (do)*   | 0.623    | 0.040    | 0.839    | 0.018    |
|                   | Mesophyll size leaves (me)* | 0.735    | 0.010    | 0.765    | 0.045    |

\* species-weighted PFTs; † unique PFT-weighted



**Table S15. Vegetation structure and soil properties**

| PFE                   | Indicator | Brazil   |          | Sumatra  |          |
|-----------------------|-----------|----------|----------|----------|----------|
|                       |           | <i>r</i> | <i>P</i> | <i>r</i> | <i>P</i> |
| Mean canopy height    | Silt%     | 0.355    | 0.046    | -0.019   | *        |
| Woody plants <2m tall | Silt%     | 0.423    | 0.016    | 0.540    | 0.031    |
|                       | Sand%     | -0.404   | 0.022    | -0.293   | *        |
| Bryophyte cov./abund. | Silt%     | 0.432    | 0.013    | -0.196   | *        |

\* ( $P > 0.05$ )

**Table S16. Species and PFT diversity and soil correlates using combined regional data**

| Target group       | Indicator | Brazil + Sumatra |          |
|--------------------|-----------|------------------|----------|
|                    |           | <i>r</i>         | <i>P</i> |
| Plant species      | Silt%     | 0.499            | 0.0001   |
|                    | Sand%     | -0.287           | 0.048    |
| PFT diversity      | Silt %    | 0.451            | 0.001    |
|                    | Sand %    | -0.411           | 0.004    |
| Bird species       | Silt%     | 0.380            | 0.046    |
| Mammal species     | Silt%     | 0.597            | 0.0001   |
| Termite abundance  | Silt%     | 0.554            | 0.017    |
| All fauna species* | Silt%     | 0.624            | 0.013    |

\* Based on joint occurrence of birds mammals and termites

**Table S17. Soil analyses for Mato Grosso (0-10 cm depth only)\***

| Transect No. | Clay % | Silt % | Sand % | pH H <sub>2</sub> O | pH_1 CaCl <sub>2</sub> | C org % | P Melich mg kg <sup>-1</sup> | K cmol <sub>c</sub> kg <sup>-1</sup> | Ca cmol <sub>c</sub> kg <sup>-1</sup> | Mg cmol <sub>c</sub> kg <sup>-1</sup> | Al cmol <sub>c</sub> kg <sup>-1</sup> |
|--------------|--------|--------|--------|---------------------|------------------------|---------|------------------------------|--------------------------------------|---------------------------------------|---------------------------------------|---------------------------------------|
| 1            | 24.0   | 5.0    | 71.0   | 4.4                 | 3.7                    | 0.9     | 1.4                          | 0.08                                 | 0.30                                  | 0.20                                  | 1.00                                  |
| 2            | 32.3   | 6.7    | 61.0   | 6.1                 | 5.2                    | 2.4     | 2.3                          | 0.20                                 | 5.10                                  | 1.50                                  | 0.00                                  |
| 3            | 14.0   | 3.3    | 82.7   | 4.3                 | 3.6                    | 1.5     | 3.2                          | 0.07                                 | 0.30                                  | 0.20                                  | 1.80                                  |
| 4            | 11.6   | 3.3    | 85.1   | 4.3                 | 3.6                    | 0.9     | 0.8                          | 0.05                                 | 0.20                                  | 0.00                                  | 1.00                                  |
| 5            | 11.6   | 3.3    | 85.1   | 3.6                 | 3.0                    | 5.7     | 5.4                          | 0.07                                 | 0.20                                  | 0.00                                  | 4.00                                  |
| 6            | 15.7   | 3.3    | 81.0   | 4.7                 | 3.0                    | 3.4     | 1.7                          | 0.12                                 | 0.20                                  | 0.10                                  | 2.80                                  |
| 7            | 18.0   | 7.0    | 75.0   | 5.6                 | 4.9                    | 0.8     | 1.4                          | 0.10                                 | 1.00                                  | 0.30                                  | 0.00                                  |
| 8            | 32.3   | 30.0   | 37.7   | 4.3                 | 3.6                    | 2.0     | 5.1                          | 0.20                                 | 0.90                                  | 0.40                                  | 2.30                                  |
| 9            | 19.0   | 6.7    | 74.3   | 4.7                 | 4.0                    | 0.1     | 2.9                          | 0.08                                 | 1.10                                  | 0.80                                  | 0.30                                  |
| 10           | 17.3   | 3.3    | 79.4   | 6.1                 | 5.2                    | 0.1     | 10.2                         | 0.08                                 | 2.90                                  | 2.30                                  | 0.60                                  |
| 11           | 12.3   | 3.4    | 84.3   | 5.3                 | 4.5                    | 0.1     | 18.0                         | 0.01                                 | 1.00                                  | 0.70                                  | 0.30                                  |
| 12           | 63.3   | 18.3   | 18.4   | 4.3                 | 3.8                    | 1.8     | 1.1                          | 0.11                                 | 0.20                                  | 0.10                                  | 2.40                                  |
| 13           | 61.6   | 13.3   | 25.1   | 4.5                 | 3.9                    | 1.8     | 0.8                          | 0.10                                 | 0.50                                  | 0.30                                  | 2.00                                  |
| 14           | 64.9   | 13.4   | 21.7   | 4.8                 | 4.2                    | 2.1     | 1.4                          | 0.16                                 | 1.40                                  | 0.70                                  | 1.10                                  |
| 15           | 66.6   | 11.7   | 21.7   | 5.7                 | 4.9                    | 2.5     | 9.8                          | 0.17                                 | 2.80                                  | 1.30                                  | 0.00                                  |
| 16           | 68.3   | 11.6   | 20.1   | 4.7                 | 4.1                    | 1.9     | 1.4                          | 0.10                                 | 1.00                                  | 0.50                                  | 1.10                                  |
| 17           | 41.6   | 13.3   | 45.1   | 6.4                 | 5.7                    | 6.1     | 272.0                        | 0.30                                 | 14.40                                 | 2.20                                  | 0.00                                  |
| 18           | 21.6   | 6.7    | 71.7   | 6.3                 | 5.4                    | 1.5     | 6.8                          | 0.14                                 | 3.30                                  | 0.60                                  | 0.00                                  |
| 19           | 68.3   | 10.0   | 21.7   | 4.7                 | 4.1                    | 1.9     | 1.1                          | 0.09                                 | 1.50                                  | 0.50                                  | 0.90                                  |
| 20           | 38.3   | 20.0   | 41.7   | 4.8                 | 4.2                    | 1.6     | 1.1                          | 0.15                                 | 1.20                                  | 0.70                                  | 0.60                                  |
| 21           | 30.6   | 15.1   | 54.3   | 4.4                 | 3.7                    | 1.3     | 2.3                          | 0.19                                 | 0.50                                  | 0.30                                  | 1.10                                  |
| 22           | 22.3   | 6.7    | 71.0   | 5.7                 | 5.0                    | 1.0     | 2.0                          | 0.17                                 | 1.80                                  | 0.70                                  | 0.00                                  |
| 23           | 19.0   | 6.7    | 74.3   | 5.4                 | 4.7                    | 1.0     | 1.4                          | 0.13                                 | 1.20                                  | 0.40                                  | 0.20                                  |
| 24           | 15.7   | 3.3    | 81.0   | 6.2                 | 5.3                    | 0.8     | 1.7                          | 0.19                                 | 1.40                                  | 0.50                                  | 0.00                                  |
| 25           | 52.3   | 6.7    | 41.0   | 4.7                 | 4.1                    | 1.5     | 2.6                          | 0.08                                 | 1.30                                  | 0.50                                  | 0.80                                  |
| 26           | 29.0   | 8.3    | 62.7   | 4.6                 | 3.9                    | 1.1     | 1.4                          | 0.16                                 | 0.40                                  | 0.20                                  | 1.00                                  |
| 27           | 19.0   | 10.0   | 71.0   | 6.5                 | 5.7                    | 2.7     | 6.1                          | 0.27                                 | 8.50                                  | 1.10                                  | 0.00                                  |
| 28           | 15.7   | 3.3    | 81.0   | 6.1                 | 5.3                    | 0.9     | 3.8                          | 0.15                                 | 2.10                                  | 0.60                                  | 0.00                                  |
| 29           | 39.0   | 20.0   | 41.0   | 4.6                 | 4.0                    | 1.7     | 1.7                          | 0.14                                 | 1.40                                  | 0.80                                  | 0.90                                  |
| 30           | 57.3   | 11.7   | 31.0   | 6.5                 | 5.7                    | 4.2     | 1.4                          | 0.31                                 | 11.50                                 | 2.60                                  | 0.00                                  |
| 31           | 29.0   | 6.7    | 64.3   | 6.8                 | 6.3                    | 6.6     | 230.9                        | 0.44                                 | 29.10                                 | 1.50                                  | 0.00                                  |
| 32           | 29.0   | 6.7    | 64.3   | 5.2                 | 6.0                    | 5.7     | 5.2                          | 0.26                                 | 10.60                                 | 1.00                                  | 0.00                                  |

(continued next page)

**Table S17. (continued)**

| <b>H</b><br><b>cmol<sub>c</sub></b><br><b>kg<sup>-1</sup></b> | <b>ECEC</b><br><b>cmol<sub>c</sub></b><br><b>kg<sup>-1</sup></b> | <b>Base</b><br><b>Sat</b><br><b>%</b> | <b>Al</b><br><b>Sat</b><br><b>%</b> | <b>Zn</b><br><b>mg</b><br><b>kg<sup>-1</sup></b> | <b>Cu</b><br><b>mg</b><br><b>kg<sup>-1</sup></b> | <b>Fe</b><br><b>mg</b><br><b>kg<sup>-1</sup></b> | <b>Mn</b><br><b>mg</b><br><b>kg<sup>-1</sup></b> | <b>S</b><br><b>mg</b><br><b>kg<sup>-1</sup></b> | <b>B</b><br><b>mg</b><br><b>kg<sup>-1</sup></b> |
|---------------------------------------------------------------|------------------------------------------------------------------|---------------------------------------|-------------------------------------|--------------------------------------------------|--------------------------------------------------|--------------------------------------------------|--------------------------------------------------|-------------------------------------------------|-------------------------------------------------|
| 3.10                                                          | 1.6                                                              | 12.4                                  | 63.3                                | 0.7                                              | 2.0                                              | 333.0                                            | 38.5                                             | 3.9                                             | 0.4                                             |
| 3.20                                                          | 6.8                                                              | 67.8                                  | 0.0                                 | 2.6                                              | 0.8                                              | 113.0                                            | 215.0                                            | 3.9                                             | 0.3                                             |
| 4.10                                                          | 2.3                                                              | 8.9                                   | 75.4                                | 0.5                                              | 0.2                                              | 58.0                                             | 4.3                                              | 8.5                                             | 0.3                                             |
| 4.00                                                          | 0.9                                                              | 9.3                                   | 65.8                                | 0.3                                              | 0.1                                              | 121.0                                            | 1.0                                              | 4.4                                             | 0.2                                             |
| 15.00                                                         | 4.1                                                              | 2.5                                   | 89.1                                | 1.3                                              | 0.2                                              | 119.0                                            | 5.0                                              | 8.5                                             | 0.5                                             |
| 12.10                                                         | 3.2                                                              | 2.8                                   | 86.6                                | 0.6                                              | 0.1                                              | 378.0                                            | 1.5                                              | 3.4                                             | 0.3                                             |
| 2.00                                                          | 1.4                                                              | 40.9                                  | 0.0                                 | 0.3                                              | 0.4                                              | 315.0                                            | 19.3                                             | 3.9                                             | 0.4                                             |
| 4.80                                                          | 3.7                                                              | 17.6                                  | 60.0                                | 1.1                                              | 0.4                                              | 257.0                                            | 10.6                                             | 6.4                                             | 0.3                                             |
| 0.50                                                          | 3.7                                                              | 28.1                                  | 29.7                                | 0.8                                              | 0.7                                              | 226.0                                            | 93.4                                             | 7.4                                             | 0.2                                             |
| 0.00                                                          | 5.6                                                              | 57.5                                  | 0.0                                 | 3.2                                              | 0.4                                              | 358.0                                            | 105.2                                            | 3.5                                             | 0.3                                             |
| 0.30                                                          | 3.2                                                              | 30.0                                  | 19.3                                | 0.7                                              | 0.1                                              | 112.0                                            | 5.3                                              | 5.9                                             | 0.3                                             |
| 4.90                                                          | 2.8                                                              | 5.4                                   | 85.1                                | 0.5                                              | 2.3                                              | 212.0                                            | 34.2                                             | 3.9                                             | 0.2                                             |
| 5.10                                                          | 2.9                                                              | 11.3                                  | 68.9                                | 0.5                                              | 1.4                                              | 186.0                                            | 35.5                                             | 3.6                                             | 0.2                                             |
| 6.40                                                          | 3.4                                                              | 23.1                                  | 33.2                                | 0.9                                              | 0.8                                              | 162.0                                            | 8.1                                              | 4.5                                             | 0.3                                             |
| 6.10                                                          | 4.3                                                              | 41.3                                  | 0.0                                 | 2.3                                              | 1.0                                              | 186.0                                            | 15.0                                             | 5.5                                             | 0.4                                             |
| 5.30                                                          | 2.8                                                              | 19.9                                  | 41.3                                | 0.8                                              | 0.8                                              | 175.0                                            | 50.0                                             | 3.9                                             | 0.2                                             |
| 8.60                                                          | 16.9                                                             | 66.4                                  | 0.0                                 | 16.5                                             | 0.2                                              | 17.0                                             | 245.0                                            | 4.6                                             | 0.8                                             |
| 2.60                                                          | 4.1                                                              | 60.6                                  | 0.0                                 | 2.1                                              | 0.8                                              | 196.0                                            | 59.7                                             | 6.6                                             | 0.3                                             |
| 5.10                                                          | 2.9                                                              | 26.1                                  | 29.4                                | 1.0                                              | 1.8                                              | 206.0                                            | 33.7                                             | 5.4                                             | 0.2                                             |
| 3.70                                                          | 2.6                                                              | 32.4                                  | 23.4                                | 3.1                                              | 1.1                                              | 185.0                                            | 135.0                                            | 5.0                                             | 0.3                                             |
| 3.60                                                          | 2.1                                                              | 17.5                                  | 53.1                                | 1.5                                              | 0.7                                              | 372.0                                            | 86.7                                             | 8.3                                             | 0.3                                             |
| 2.40                                                          | 2.7                                                              | 52.7                                  | 0.0                                 | 1.4                                              | 2.0                                              | 196.0                                            | 150.0                                            | 9.0                                             | 0.4                                             |
| 3.00                                                          | 2                                                                | 34.9                                  | 10.3                                | 0.9                                              | 0.6                                              | 314.0                                            | 151.0                                            | 8.1                                             | 0.3                                             |
| 1.70                                                          | 2                                                                | 55.9                                  | 0.0                                 | 1.4                                              | 0.4                                              | 182.0                                            | 150.0                                            | 7.3                                             | 0.3                                             |
| 4.40                                                          | 2.7                                                              | 26.7                                  | 28.5                                | 0.8                                              | 2.0                                              | 365.0                                            | 65.8                                             | 17.3                                            | 0.3                                             |
| 3.60                                                          | 1.7                                                              | 14.3                                  | 56.7                                | 0.7                                              | 1.7                                              | 386.0                                            | 51.7                                             | 3.5                                             | 0.3                                             |
| 2.10                                                          | 9.9                                                              | 82.2                                  | 0.0                                 | 6.9                                              | 1.3                                              | 92.0                                             | 170.0                                            | 10.6                                            | 0.3                                             |
| 1.70                                                          | 2.8                                                              | 63.3                                  | 0.0                                 | 2.1                                              | 0.3                                              | 219.0                                            | 135.8                                            | 11.8                                            | 0.2                                             |
| 4.30                                                          | 3.2                                                              | 31.2                                  | 27.2                                | 0.8                                              | 0.9                                              | 383.0                                            | 72.9                                             | 4.0                                             | 0.3                                             |
| 4.20                                                          | 14.4                                                             | 77.6                                  | 0.0                                 | 7.7                                              | 9.5                                              | 135.0                                            | 177.0                                            | 10.0                                            | 0.3                                             |
| 4.40                                                          | 31                                                               | 87.6                                  | 0.0                                 | 5.5                                              | 0.8                                              | 11.0                                             | 160.0                                            | 10.1                                            | 0.3                                             |
| 10.20                                                         | 11.8                                                             | 53.9                                  | 0.0                                 | 2.6                                              | 0.5                                              | 35.0                                             | 214.0                                            | 9.4                                             | 0.3                                             |

\* Source: E.G. Couto. Note: High P values in transects 17 and 31 are from ultrabasic outcrops. Complete profile data available from contact author

**Table S18. Soil and carbon analyses for Jambi, Sumatra (averaged 0-10 cm depth only)**

| Transect number | Clay % | Silt % | Sand % | pH H <sub>2</sub> O | pH KCl | C org % | N tot % | P Bray <sub>II</sub> mg kg <sup>-1</sup> | K cmol <sub>c</sub> kg <sup>-1</sup> |
|-----------------|--------|--------|--------|---------------------|--------|---------|---------|------------------------------------------|--------------------------------------|
| 1               | 16.0   | 22.0   | 62.0   | 4.35                | 3.65   | 2.9     | 0.21    | 7.2                                      | 0.12                                 |
| 2               | 11.5   | 20.5   | 68.0   | 4.45                | 3.65   | 2.6     | 0.16    | 7.9                                      | 0.15                                 |
| 3               | 23.5   | 9.0    | 67.5   | 4.85                | 3.75   | 1.7     | 0.125   | 3.9                                      | 0.11                                 |
| 4               | 9.5    | 10.5   | 80.0   | 4.25                | 3.55   | 3.9     | 0.23    | 11.6                                     | 0.13                                 |
| 5               | 8.0    | 13.0   | 79.0   | 4.35                | 3.55   | 3.2     | 0.20    | 6.2                                      | 0.15                                 |
| 6               | 8.0    | 9.0    | 83.0   | 4.35                | 3.90   | 2.5     | 0.15    | 13.8                                     | 0.12                                 |
| 7               | 31.0   | 23.5   | 45.5   | 5.20                | 3.85   | 3.2     | 0.22    | 5.0                                      | 0.31                                 |
| 8               | 67.0   | 19.0   | 14.0   | 4.55                | 3.60   | 4.5     | 0.28    | 0.7                                      | 0.15                                 |
| 9               | 58.0   | 28.0   | 14.0   | 4.60                | 3.65   | 2.8     | 0.42    | 8.8                                      | 0.20                                 |
| 10              | 29.5   | 64.0   | 6.5    | 5.15                | 3.80   | 5.1     | 0.37    | 29.0                                     | 0.37                                 |
| 11              | 40.0   | 51.0   | 9.0    | 5.35                | 3.90   | 4.5     | 0.32    | 21.5                                     | 0.35                                 |
| 12              | 21.0   | 12.5   | 66.5   | 5.65                | 4.15   | 2.1     | 0.12    | 7.3                                      | 0.16                                 |
| 13              | 24.5   | 9.0    | 66.5   | 5.65                | 4.00   | 2.2     | 0.12    | 3.6                                      | 0.14                                 |
| 14              | 25.0   | 16.0   | 59.0   | 5.00                | 3.80   | 1.4     | 0.10    | 12.1                                     | 0.10                                 |
| 15              | 20.0   | 15.5   | 64.5   | 5.10                | 3.85   | 1.7     | 0.11    | 12.6                                     | 0.11                                 |
| 16              | 28.5   | 62.5   | 9.0    | 5.50                | 4.05   | 4.1     | 0.30    | 26.5                                     | 0.38                                 |

**Table S18 continued..**

| Na cmol <sub>c</sub> kg <sup>-1</sup> | Ca cmol <sub>c</sub> kg <sup>-1</sup> | Mg cmol <sub>c</sub> kg <sup>-1</sup> | Al cmol <sub>c</sub> kg <sup>-1</sup> | H cmol <sub>c</sub> kg <sup>-1</sup> | ECEC cmol <sub>c</sub> kg <sup>-1</sup> | Al sat. % | Ag C kg m <sup>2</sup> | Tot C kg m <sup>2</sup> |
|---------------------------------------|---------------------------------------|---------------------------------------|---------------------------------------|--------------------------------------|-----------------------------------------|-----------|------------------------|-------------------------|
| 0.29                                  | 0.29                                  | 0.46                                  | 4.19                                  | 1.00                                 | 7.67                                    | 54.7      | 52.39                  | 55.72                   |
| 0.27                                  | 0.27                                  | 0.36                                  | 3.62                                  | 1.05                                 | 6.99                                    | 52.1      | 42.27                  | 45.85                   |
| 0.27                                  | 0.27                                  | 0.36                                  | 2.81                                  | 0.52                                 | 5.87                                    | 47.8      | 13.30                  | 16.43                   |
| 0.25                                  | 0.25                                  | 1.18                                  | 3.72                                  | 1.23                                 | 7.85                                    | 47.4      | 22.03                  | 27.49                   |
| 0.33                                  | 0.33                                  | 0.76                                  | 2.83                                  | 1.31                                 | 6.98                                    | 40.7      | 39.86                  | 43.81                   |
| 0.28                                  | 0.28                                  | 0.91                                  | 2.64                                  | 0.59                                 | 6.24                                    | 42.3      | 11.24                  | 15.77                   |
| 0.53                                  | 0.53                                  | 1.35                                  | 1.61                                  | 0.54                                 | 8.76                                    | 18.7      | 5.01                   | 10.18                   |
| 0.32                                  | 0.32                                  | 0.63                                  | 3.38                                  | 1.66                                 | 8.41                                    | 40.3      | 10.01                  | 15.84                   |
| 0.37                                  | 0.37                                  | 0.50                                  | 4.45                                  | 1.55                                 | 8.525                                   | 51.2      | 13.89                  | 18.19                   |
| 0.66                                  | 0.66                                  | 0.59                                  | 5.18                                  | 2.06                                 | 10.90                                   | 47.6      | 16.09                  | 22.60                   |
| 0.56                                  | 0.56                                  | 0.28                                  | 3.68                                  | 1.64                                 | 8.42                                    | 43.7      | 14.24                  | 20.48                   |
| 0.36                                  | 0.36                                  | 0.72                                  | 1.12                                  | 0.33                                 | 4.36                                    | 26.7      | 0.15                   | 4.68                    |
| 0.43                                  | 0.43                                  | 0.61                                  | 1.33                                  | 0.67                                 | 4.17                                    | 31.9      | 0.12                   | 5.58                    |
| 0.24                                  | 0.24                                  | 0.87                                  | 2.13                                  | 0.45                                 | 4.91                                    | 43.4      | 0.12                   | 3.28                    |
| 0.35                                  | 0.35                                  | 0.48                                  | 1.51                                  | 0.59                                 | 4.73                                    | 32.0      | 0.15                   | 4.22                    |
| 0.79                                  | 0.79                                  | 1.49                                  | 1.92                                  | 1.18                                 | 7.84                                    | 25.2      | 0.40                   | 6.82                    |

\* Source: K. Hairiah, M. van Noordwijk. Complete profile data available from contact author; Ag C kg m<sup>2</sup> = Aboveground carbon, Tot C kg m<sup>2</sup> = Total carbon

**Table S19. Indicators of aboveground and total carbon - Sumatran baseline**

| Indicator                           | Aboveground<br>Carbon (kg m <sup>-2</sup> ) |          | Total<br>Carbon (kg m <sup>-2</sup> ) |          |
|-------------------------------------|---------------------------------------------|----------|---------------------------------------|----------|
|                                     | <i>r</i>                                    | <i>P</i> | <i>r</i>                              | <i>P</i> |
| Crown cover %, woody:non-woody plts | 0.929                                       | 0.0001   | 0.932                                 | 0.0001   |
| Tree species diversity              | 0.885                                       | 0.0001   | 0.893                                 | 0.0001   |
| Mean canopy height                  | 0.880                                       | 0.0001   | 0.892                                 | 0.0001   |
| Spp.:PFTs                           | 0.861                                       | 0.0001   | 0.867                                 | 0.0001   |
| Basal area                          | 0.846                                       | 0.0001   | 0.861                                 | 0.0001   |
| Plant species diversity             | 0.789                                       | 0.0001   | 0.827                                 | 0.0001   |
| Plant litter depth                  | 0.663                                       | 0.005    | 0.662                                 | 0.005    |
| Plant Functional Complexity (PFC)   | 0.603                                       | 0.013    | 0.640                                 | 0.008    |
| Unique PFT diversity                | 0.577                                       | 0.019    | 0.621                                 | 0.010    |
| Bryophyte cover abundance           | 0.601                                       | 0.014    | 0.612                                 | 0.012    |
| Crown cover % woody plants          | 0.552                                       | 0.027    | 0.586                                 | 0.017    |
| Crown cover % non-woody plants      | -0.535                                      | 0.033    | -0.534                                | 0.033    |
| -----                               | -----                                       | -----    | -----                                 | -----    |
| Termite species diversity           | 0.890                                       | 0.007    | 0.898                                 | 0.006    |
| Termite abundance                   | 0.789                                       | 0.035    | 0.802                                 | 0.030    |

**Table S20. Data variables recorded for each 40x5m transect (VegClass)\***

| Site feature          | Descriptor                                                          | Data type                                            |
|-----------------------|---------------------------------------------------------------------|------------------------------------------------------|
| Location reference    | Location                                                            | Alpha-numeric                                        |
|                       | Date (dd-mm-year)                                                   | Alpha-numeric                                        |
|                       | Plot number (unique)                                                | Alpha-numeric                                        |
|                       | Country                                                             | Text                                                 |
| Observer/s            | Observer/s by name                                                  | Text                                                 |
| Physical              | Latitude deg.min.sec. (GPS)                                         | Alpha-numeric                                        |
|                       | Longitude deg.min.sec. (GPS)                                        | Alpha-numeric                                        |
|                       | Elevation (m.a.s.l.) (aneroid and GPS)                              | Numeric                                              |
|                       | Aspect (compass deg.) (perpendicular to plot)                       | Numeric                                              |
|                       | Slope percent (perpendicular to plot)                               | Numeric                                              |
|                       | Soil depth (cm) (sample taken 0-10, 10-20cm)                        | Numeric                                              |
|                       | Soil type (US Soil taxonomy preferred)                              | Text                                                 |
|                       | Parent rock type                                                    | Text                                                 |
|                       | Litter depth (cm)                                                   | Numeric                                              |
|                       | Terrain position                                                    | Text                                                 |
|                       | Site history                                                        | General description and land-use / landscape context |
| Vegetation structure  | Vegetation type                                                     | Text                                                 |
|                       | Mean canopy height (m)                                              | Numeric                                              |
|                       | Canopy cover percent (total)                                        | Numeric                                              |
|                       | Cover-abundance (Domin Scale) - bryophytes                          | Numeric                                              |
|                       | Cover-abundance (DS) woody plants <1.5 m tall                       | Numeric                                              |
|                       | Basal area (mean of 3) (m <sup>2</sup> ha <sup>-1</sup> );          | Numeric                                              |
|                       | Furcation index (mean and cv % of 20)                               | Numeric                                              |
|                       | Profile sketch of 40x5 m plot (scannable)                           | Digital                                              |
| Plant taxa (vascular) | Family                                                              | Text                                                 |
|                       | Genus                                                               | Text                                                 |
|                       | Species                                                             | Text                                                 |
|                       | Botanical authority                                                 | Text                                                 |
| Plant Functional Type | Plant functional elements combined according to published rule set. | Text                                                 |
| Photograph            | Hard copy and digital image                                         | JPEG                                                 |

\* Does not include soil analytical and faunal data. VegClass program downloadable at [www.cbmglobe.org](http://www.cbmglobe.org) and [www.cifor.org](http://www.cifor.org)

**Table S21 Significant and close-to significant positive regression slopes**

| <b>Regressand</b> | <b>Regressor</b> | <b>P-value</b> |                   |                | <b>FDR</b>        |
|-------------------|------------------|----------------|-------------------|----------------|-------------------|
| <b>variable</b>   | <b>variable</b>  | <b>d.f.</b>    | <b>millionths</b> | <b>t-value</b> | <b>millionths</b> |
| Spp               | phw              | 46             | 0                 | 12.599         | 0                 |
| Spp               | SPRAT            | 46             | 0                 | 10.151         | 0                 |
| Spp               | dow              | 46             | 0                 | 10.069         | 0                 |
| Spp               | PFT              | 46             | 0                 | 10.066         | 0                 |
| Spp               | law              | 46             | 0                 | 8.988          | 0                 |
| Spp               | mew              | 46             | 0                 | 7.736          | 0                 |
| Spp               | now              | 46             | 0                 | 7.572          | 0                 |
| la                | Al               | 46             | 0                 | 7.504          | 0                 |
| me                | Al               | 46             | 0                 | 7.311          | 0                 |
| do                | Al               | 46             | 0                 | 7.228          | 0                 |
| no                | Al               | 46             | 0                 | 7.150          | 0                 |
| Spp               | ctw              | 46             | 0                 | 7.096          | 0                 |
| Spp               | liw              | 46             | 0                 | 6.969          | 0                 |
| Spp               | PFC              | 46             | 0                 | 6.681          | 0                 |
| Spp               | row              | 46             | 0                 | 6.501          | 0                 |
| T.Abd             | SPRAT            | 16             | 0                 | 9.519          | 0                 |
| SPRAT             | Al               | 46             | 0                 | 6.467          | 0                 |
| Mam               | la               | 29             | 0                 | 7.194          | 0                 |
| All.F             | T.Abd            | 13             | 0                 | 10.823         | 0                 |
| T.Abd             | ph               | 16             | 0                 | 9.512          | 0                 |
| ch                | Silt             | 46             | 0                 | 6.030          | 1                 |
| ph                | Al               | 46             | 0                 | 6.028          | 1                 |
| Spp               | Al               | 46             | 0                 | 5.986          | 1                 |
| mi                | Al               | 46             | 0                 | 5.940          | 2                 |
| Mam               | do               | 29             | 1                 | 6.265          | 3                 |
| li                | Al               | 46             | 1                 | 5.657          | 4                 |
| Mam               | no               | 29             | 1                 | 6.152          | 4                 |
| Birds             | All.F            | 13             | 1                 | 8.463          | 3                 |
| Mam               | me               | 29             | 1                 | 6.038          | 5                 |
| ct                | Al               | 46             | 2                 | 5.466          | 7                 |
| T.Abd             | no               | 16             | 2                 | 7.282          | 5                 |
| Spp               | suw              | 46             | 2                 | 5.442          | 8                 |
| Birds             | la               | 26             | 2                 | 5.998          | 8                 |
| Spp               | adw              | 46             | 3                 | 5.340          | 11                |
| Birds             | me               | 26             | 4                 | 5.907          | 10                |
| T.Abd             | la               | 16             | 4                 | 6.895          | 9                 |
| T.Spp             | T.Abd            | 16             | 4                 | 6.833          | 10                |
| Birds             | ph               | 26             | 4                 | 5.802          | 13                |
| Birds             | ct               | 26             | 4                 | 5.799          | 13                |
| T.Abd             | do               | 16             | 5                 | 6.679          | 14                |
| hc                | Silt             | 46             | 5                 | 5.144          | 20                |
| chw               | Clay             | 46             | 5                 | 5.143          | 20                |
| Mam               | Al               | 29             | 9                 | 5.389          | 27                |
| Mam               | law              | 29             | 9                 | 5.363          | 29                |

| <b>Regressand</b> | <b>Regressor</b> | <b>P-value</b> |     | <b>FDR</b> |     |
|-------------------|------------------|----------------|-----|------------|-----|
| T.Spp             | SPRAT            | 16             | 9   | 6.369      | 23  |
| T.Abd             | li               | 16             | 9   | 6.363      | 23  |
| Birds             | do               | 26             | 12  | 5.382      | 37  |
| All.F             | ph               | 13             | 14  | 6.751      | 30  |
| T.Abd             | me               | 16             | 21  | 5.941      | 50  |
| li                | Silt             | 46             | 22  | 4.725      | 72  |
| T.Spp             | ph               | 16             | 24  | 5.864      | 57  |
| Spp               | Mam              | 29             | 25  | 5.005      | 73  |
| Spp               | Barea            | 46             | 28  | 4.648      | 91  |
| Birds             | no               | 26             | 33  | 5.002      | 93  |
| Spp               | pvw              | 46             | 34  | 4.593      | 107 |
| Mam               | li               | 29             | 36  | 4.871      | 103 |
| Spp               | Ht               | 46             | 37  | 4.564      | 117 |
| Mam               | ct               | 29             | 45  | 4.797      | 125 |
| me                | Silt             | 46             | 48  | 4.488      | 146 |
| T.Abd             | ct               | 16             | 50  | 5.488      | 113 |
| do                | Silt             | 46             | 53  | 4.457      | 160 |
| All.F             | la               | 13             | 53  | 5.892      | 110 |
| Mam               | ph               | 29             | 53  | 4.732      | 147 |
| ch                | Clay             | 46             | 55  | 4.445      | 166 |
| Spp               | hcw              | 46             | 56  | 4.440      | 168 |
| Birds             | SPRAT            | 26             | 64  | 4.757      | 169 |
| Mam               | mi               | 29             | 80  | 4.586      | 213 |
| dew               | C org            | 46             | 81  | 4.324      | 236 |
| phw               | Al               | 46             | 83  | 4.319      | 240 |
| Spp               | T.Abd            | 16             | 94  | 5.163      | 207 |
| Spp               | W plts           | 46             | 96  | 4.271      | 275 |
| Birds             | Mam              | 26             | 107 | 4.592      | 251 |
| de                | C org            | 46             | 112 | 4.224      | 315 |
| Spp               | T.Spp            | 16             | 116 | 5.061      | 250 |
| Spp               | fiw              | 46             | 119 | 4.206      | 332 |
| de                | K                | 46             | 122 | 4.199      | 339 |
| dew               | CEC              | 46             | 124 | 4.193      | 345 |
| T.Spp             | la               | 16             | 125 | 5.025      | 268 |
| la                | Silt             | 46             | 128 | 4.184      | 354 |
| T.Spp             | no               | 16             | 134 | 4.989      | 286 |
| de                | Ca               | 46             | 158 | 4.117      | 427 |
| de                | CEC              | 46             | 162 | 4.109      | 438 |
| All.F             | do               | 13             | 165 | 5.222      | 320 |
| All.F             | li               | 13             | 173 | 5.194      | 334 |
| mi                | Silt             | 46             | 182 | 4.072      | 485 |
| vew               | Ca               | 46             | 184 | 4.068      | 490 |
| All.F             | ct               | 13             | 203 | 5.102      | 389 |
| All.F             | SPRAT            | 13             | 211 | 5.081      | 402 |
| All.F             | me               | 13             | 214 | 5.073      | 407 |
| Spp               | Bryo             | 46             | 219 | 4.013      | 572 |
| Mam               | su               | 29             | 219 | 4.221      | 530 |
| All.F             | no               | 13             | 220 | 5.056      | 418 |



| <b>Regressand</b> | <b>Regressor</b> | <b>P-value</b> |      | <b>FDR</b> |      |
|-------------------|------------------|----------------|------|------------|------|
| crw               | Silt             | 46             | 236  | 3.989      | 610  |
| hew               | Silt             | 46             | 254  | 3.965      | 653  |
| Birds             | mi               | 26             | 261  | 4.222      | 606  |
| dew               | K                | 46             | 262  | 3.955      | 670  |
| Mam               | fi               | 16             | 284  | 4.126      | 668  |
| Spp               | Silt             | 46             | 304  | 3.908      | 763  |
| Mam               | phw              | 29             | 314  | 4.089      | 730  |
| Mam               | All.F            | 13             | 330  | 4.828      | 608  |
| no                | Silt             | 46             | 336  | 3.875      | 834  |
| T.Spp             | li               | 16             | 337  | 4.537      | 668  |
| Birds             | T.Abd            | 16             | 369  | 4.765      | 435  |
| Mam               | SPRAT            | 29             | 377  | 4.022      | 858  |
| T.Spp             | do               | 16             | 379  | 4.480      | 743  |
| Mam               | Silt             | 29             | 390  | 4.010      | 885  |
| law               | Al               | 46             | 391  | 3.826      | 951  |
| Mam               | fiw              | 29             | 452  | 3.955      | 1007 |
| Birds             | li               | 26             | 458  | 4.008      | 999  |
| Mam               | P                | 29             | 463  | 3.946      | 1030 |
| mew               | Al               | 46             | 520  | 3.733      | 1217 |
| su                | Silt             | 46             | 532  | 3.725      | 1243 |
| Mam               | suw              | 29             | 564  | 3.873      | 1224 |
| now               | Silt             | 46             | 586  | 3.694      | 1350 |
| Spp               | CCwdy            | 46             | 693  | 3.638      | 1559 |
| fi                | Al               | 46             | 696  | 3.636      | 1565 |
| T.Spp             | phw              | 16             | 711  | 4.178      | 1308 |
| Mam               | now              | 29             | 716  | 3.785      | 1505 |
| All.F             | T.Spp            | 13             | 739  | 4.384      | 1266 |
| Spp               | plw              | 46             | 759  | 3.607      | 1686 |
| liw               | Silt             | 46             | 795  | 3.592      | 1752 |
| T.Abd             | Al               | 16             | 844  | 4.096      | 1522 |
| fiw               | Silt             | 46             | 849  | 3.570      | 1853 |
| ad                | Silt             | 46             | 859  | 3.566      | 1872 |
| fi                | Silt             | 46             | 1093 | 3.485      | 2294 |
| pe                | C org            | 46             | 1152 | 3.467      | 2396 |
| Spp               | Litt             | 46             | 1170 | 3.462      | 2429 |
| pew               | Clay             | 46             | 1235 | 3.443      | 2540 |
| Spp               | epw              | 46             | 1238 | 3.442      | 2545 |
| dow               | Silt             | 46             | 1297 | 3.427      | 2645 |
| PFT               | Silt             | 46             | 1313 | 3.422      | 2672 |
| Mam               | hc               | 29             | 1336 | 3.550      | 2564 |
| now               | Al               | 46             | 1372 | 3.407      | 2772 |
| Mam               | me               | 29             | 1391 | 3.535      | 2653 |
| pew               | C org            | 46             | 1397 | 3.401      | 2814 |
| pew               | CEC              | 46             | 1474 | 3.383      | 2941 |
| fiw               | Al               | 46             | 1514 | 3.374      | 3007 |
| law               | Silt             | 46             | 1596 | 3.355      | 3140 |
| pew               | K                | 46             | 1671 | 3.395      | 3260 |
| pe                | CEC              | 46             | 1674 | 3.339      | 3264 |

| <b>Regressand</b> | <b>Regressor</b> | <b>P-value</b> |      |       | <b>FDR</b> |
|-------------------|------------------|----------------|------|-------|------------|
| mew               | Si               | 46             | 1707 | 3.332 | 3317       |
| Birds             | Al               | 26             | 1730 | 3.492 | 3129       |
| Spp               | Birds            | 26             | 1752 | 3.487 | 3163       |
| T.Abd             | phw              | 16             | 1813 | 3.733 | 2956       |
| T.Spp             | ct               | 16             | 1839 | 3.726 | 2991       |
| pe                | Clay             | 46             | 1967 | 3.283 | 3723       |
| Mam               | T.Abd            | 16             | 2064 | 3.772 | 2755       |
| pe                | K                | 46             | 2099 | 3.260 | 3925       |
| Spp               | cow              | 46             | 2118 | 3.257 | 3954       |
| Spp               | All.F            | 13             | 2134 | 3.818 | 3213       |
| Mam               | hew              | 29             | 2318 | 3.339 | 4045       |
| T.Spp             | Litt             | 16             | 2403 | 3.599 | 3749       |

The eight positive slopes below are borderline significant, having  $P$ -values in excess of 0.0025 (2500 in the relevant column). However they could be sufficiently close to significance to be of interest. All eight of them have  $t$ -values in excess of 3.000. The test statistic,  $t$ , is the slope of the line divided by its standard error.

| <b>Regressand variable</b> | <b>Regressor variable</b> | <b>d.f.</b> | <b>P-value millionths</b> | <b>t-value</b> | <b>FDR millionths</b> |
|----------------------------|---------------------------|-------------|---------------------------|----------------|-----------------------|
| T.Spp                      | me                        | 16          | 2542                      | 3.573          | 3928                  |
| suw                        | Silt                      | 46          | 3142                      | 3.117          | 5407                  |
| W plts                     | Al Sat                    | 46          | 3216                      | 3.109          | 5507                  |
| Litt                       | H                         | 46          | 3381                      | 3.091          | 5725                  |
| pew                        | H                         | 46          | 3564                      | 3.072          | 5964                  |
| Mam                        | ad                        | 29          | 3727                      | 3.154          | 5910                  |
| All.F                      | Al                        | 13          | 4436                      | 3.435          | 5909                  |
| T.Abd                      | mi                        | 16          | 4510                      | 3.301          | 6265                  |

The cut-off between significance and non-significance is taken to be  $P= 0.0025$ . This corresponds closely to an FDR of 0.04908, or approximately to one of 5%. The immediately next ten slopes of either sign consisted of five positives and five negatives, of themselves suggesting that the remaining slopes would be approximately half positive and half negative. However taking the next 50 slopes (instead of the next ten) of either sign, these were comprised of 31 positives and 19 negatives, instead indicating an estimated 38% False Discovery Rate (FDR) in that range of  $P$ -values. After these first 50, the estimated FDR still initially continued to increase. In consequence it seemed unnecessary to carry this table any further. (For further details as to the performance of the FDR at high values of  $P$ , see Table S21.) It is, however, consistent with a finding in Part 3 of Brewer et al. (2012a) to report that the regression coefficients with the largest values of  $P$  (say those between  $P= 0.85$  or  $0.90$  and  $P= 1.00$ ) appeared to be dominated by an inferred subpopulation labelled  $P_0$ ; which consisted entirely of observations that were distributed symmetrically around zero.

Brewer KRW, Hayes G, Gillison AN (2012) Understanding and using Fisher's  $p$ . Part 3: Examining an empirical data set. *Math Scientist* 37:20-26.

**Table S22. Significant and close-to significant negative regression slopes**

| <b>Regressand variable</b> | <b>Regressor variable</b> | <b>d.f.</b> | <b><i>P</i>-value millionths</b> | <b><i>t</i>-value</b> | <b>FDR millionths</b> |
|----------------------------|---------------------------|-------------|----------------------------------|-----------------------|-----------------------|
| ch                         | Sand                      | 46          | 0                                | -8.057                | 0                     |
| O                          | K                         | 26          | 65                               | -4.753                | 170                   |
| chw                        | Sand                      | 46          | 135                              | -4.167                | 371                   |
| now                        | Sand                      | 46          | 144                              | -4.145                | 394                   |
| fi                         | Sand                      | 46          | 281                              | -3.932                | 713                   |
| W plts                     | pH_2                      | 46          | 341                              | -3.871                | 844                   |
| fiw                        | Sand                      | 46          | 440                              | -3.788                | 1054                  |
| Totcc                      | P                         | 46          | 716                              | -3.627                | 1604                  |
| liw                        | Sand                      | 46          | 829                              | -3.578                | 1816                  |
| Totcc                      | Ca                        | 46          | 913                              | -3.546                | 1972                  |
| Spp                        | pH_2                      | 46          | 1562                             | -3.363                | 3085                  |
| li                         | Sand                      | 46          | 2136                             | -3.254                | 3980                  |

The two slopes below are borderline significant. The values of Fisher's *P*-statistic exceed 0.0025 (2500 in millionths) and the values of *t* (especially when the degrees of freedom are few) tend to be larger than 3. The test statistic, *t*, is the slope of the line divided by its standard error.

| <b>Regressand variable</b> | <b>Regressor variable</b> | <b>d.f.</b> | <b><i>P</i>-value millionths</b> | <b><i>t</i>-value</b> | <b>FDR millionths</b> |
|----------------------------|---------------------------|-------------|----------------------------------|-----------------------|-----------------------|
| mew                        | Sand                      | 46          | 2672                             | -3.175                | 4760                  |
| SPRAT                      | PH_2                      | 46          | 3141                             | -3.118                | 5406                  |

The cut-off between significance and non-significance is taken to be  $P= 0.0025$ . This corresponds closely to an FDR of 0.04908, or approximately to one of 5%.

**Table S23. False discovery rates from an analysis of 1307 regressions: numbers of regression slopes within 20 ranges of Fisher's *P* statistic.**

|                                 |                      |                      |                        |                      |                      |                      |
|---------------------------------|----------------------|----------------------|------------------------|----------------------|----------------------|----------------------|
| Ranges                          | 1.00> <i>P</i> >0.95 | 0.95> <i>P</i> >0.90 | 0.90> <i>P</i> >0.85   | 0.85> <i>P</i> >0.80 | 0.80> <i>P</i> >0.75 | 0.75> <i>P</i> >0.70 |
| Positive                        | 10                   | 16                   | 15                     | 17                   | 21                   | 26                   |
| Negative                        | 18                   | 19                   | 17                     | 22                   | 23                   | 27                   |
| Total                           | 28                   | 35                   | 32                     | 39                   | 44                   | 53                   |
| % positive                      | 35.7                 | 45.7                 | 46.9                   | 43.5                 | 47.7                 | 49.1                 |
| Ranges                          | 0.70> <i>P</i> >0.65 | 0.65> <i>P</i> >0.60 | 0.60> <i>P</i> >0.55   | 0.55> <i>P</i> >0.50 | 0.50> <i>P</i> >0.45 | 0.45> <i>P</i> >0.40 |
| Positive                        | 17                   | 26                   | 11                     | 23                   | 27                   | 31                   |
| Negative                        | 25                   | 23                   | 31                     | 30                   | 17                   | 20                   |
| Total                           | 42                   | 49                   | 42                     | 43                   | 44                   | 51                   |
| % positive                      | 40.5                 | 53.1                 | 26.2                   | 53.5                 | 61.4                 | 60.8                 |
| Ranges                          | 0.40> <i>P</i> >0.35 | 0.35> <i>P</i> >0.30 | 0.30> <i>P</i> >0.25   | 0.25> <i>P</i> >0.20 | 0.20> <i>P</i> >0.15 | 0.15> <i>P</i> >0.10 |
| Positive                        | 24                   | 27                   | 15                     | 29                   | 21                   | 36                   |
| Negative                        | 25                   | 28                   | 28                     | 25                   | 25                   | 53                   |
| Total                           | 49                   | 55                   | 43                     | 54                   | 46                   | 89                   |
| % positive                      | 49.0                 | 49.1                 | 34.9                   | 53.7                 | 45.7                 | 40.4                 |
| Ranges                          | 0.10> <i>P</i> >0.05 | 0.05> <i>P</i> >0.00 | 0.05> <i>P</i> >0.0025 |                      | 0.0025> <i>P</i>     |                      |
| Positive                        | 52                   | 271                  | Significantly positive |                      | 0                    | 148                  |
| Negative                        | 43                   | 103                  | Significantly negative |                      | 0                    | 12                   |
| Total                           | 95                   | 374                  | Total significant      |                      | 0                    | 160                  |
| % positive                      | 54.7                 | 72.5                 | Total not significant  |                      | 214                  | 0                    |
| Totals over all ranges combined |                      |                      |                        |                      |                      |                      |
| Total positive 715              |                      | Total negative 592   |                        | Grand total 1307     |                      |                      |
